# Supplementary material for: Characterization of Acetylation of Histone H3 at Lysine 9 in the Trigeminal Ganglion of a Rat Trigeminal Neuralgia Model
Source: Hindawi journal article supplement (doi:10.1155/2022/1300387), 2022-01-01
Supplement: f1 [file 1300387.f1.pdf]

**Table S1. The list of DEGs with significant H3K9ac and HDAC3 enrichments.**

| <b>GeneName</b> | <b>Annotation</b>                                                            |
|-----------------|------------------------------------------------------------------------------|
| AL731706.1      | novel protein                                                                |
| Sspo            | SCO-spondin                                                                  |
| Gm45785         | predicted gene 45785                                                         |
| Mettl7b         | methyltransferase like 7B                                                    |
| Fgf21           | fibroblast growth factor 21                                                  |
| Npcd            | neuronal pentraxin chromo domain                                             |
| Neurod2         | neuronal differentiation 2                                                   |
| Trem3           | triggering receptor expressed on myeloid cells 3                             |
| Kif21b          | kinesin family member 21B                                                    |
| Cass4           | Cas scaffolding protein family member 4                                      |
| Gm44973         | predicted gene 44973                                                         |
| Rec114          | REC114 meiotic recombination protein                                         |
| Adm2            | adrenomedullin 2                                                             |
| Olf996          | olfactory receptor 996                                                       |
| Igf2bp3         | insulin-like growth factor 2 mRNA binding protein 3                          |
| C2cd4c          | C2 calcium-dependent domain containing 4C                                    |
| G0s2            | G0/G1 switch gene 2                                                          |
| Rad21l          | RAD21-like ( <i>S. pombe</i> )                                               |
| Rdh9            | retinol dehydrogenase 9                                                      |
| Cdk15           | cyclin-dependent kinase 15                                                   |
| Nyx             | nyctalopin                                                                   |
| P2rx7           | purinergic receptor P2X, ligand-gated ion channel, 7                         |
| Bdkrb2          | bradykinin receptor, beta 2                                                  |
| Calcb           | calcitonin-related polypeptide, beta                                         |
| Gm13539         | predicted gene 13539                                                         |
| Gm10378         | predicted gene 10378                                                         |
| Vmn1r34         | vomer nasal 1 receptor 34                                                    |
| Vmn1r32         | vomer nasal 1 receptor 32                                                    |
| Aknad1          | AKNA domain containing 1                                                     |
| Fut1            | fucosyltransferase 1                                                         |
| Entpd2          | ectonucleoside triphosphate diphosphohydrolase 2                             |
| Lcp2            | lymphocyte cytosolic protein 2                                               |
| Mef2b           | myocyte enhancer factor 2B                                                   |
| Gpnmb           | glycoprotein (transmembrane) nmb                                             |
| Nnmt            | nicotinamide N-methyltransferase                                             |
| Calcr1          | calcitonin receptor-like                                                     |
| Sf3b4           | splicing factor 3b, subunit 4                                                |
| Adgrd1          | adhesion G protein-coupled receptor D1                                       |
| Elfn2           | leucine rich repeat and fibronectin type III, extracellular 2                |
| 1810010D01Rik   | RIKEN cDNA 1810010D01 gene                                                   |
| Slc19a3         | solute carrier family 19, member 3                                           |
| Tyrobp          | TYRO protein tyrosine kinase binding protein                                 |
| Trib3           | tribbles pseudokinase 3                                                      |
| Mcidas          | multiciliate differentiation and DNA synthesis associated cell cycle protein |
| Dcn             | decorin                                                                      |
| Bex4            | brain expressed X-linked 4                                                   |
| Gm9936          | predicted gene 9936                                                          |
| Chst4           | carbohydrate sulfotransferase 4                                              |
| Tac4            | tachykinin 4                                                                 |
| Bglap3          | bone gamma-carboxyglutamate protein 3                                        |

|               |                                                                    |
|---------------|--------------------------------------------------------------------|
| Arap3         | ArfGAP with RhoGAP domain, ankyrin repeat and PH domain 3          |
| Pvrig         | poliovirus receptor related immunoglobulin domain containing       |
| 4930583I09Rik | RIKEN cDNA 4930583I09 gene                                         |
| Nmrk2         | nicotinamide riboside kinase 2                                     |
| Mfsd4b1       | major facilitator superfamily domain containing 4B1                |
| Ephx4         | epoxide hydrolase 4                                                |
| Hpd           | 4-hydroxyphenylpyruvic acid dioxygenase                            |
| Gm21985       | predicted gene 21985                                               |
| Crp           | C-reactive protein, pentraxin-related                              |
| Gm266         | predicted gene 266                                                 |
| Gm21983       | predicted gene 21983                                               |
| Dennd2d       | DENN/MADD domain containing 2D                                     |
| Pcsk9         | proprotein convertase subtilisin/kexin type 9                      |
| Fgfr1         | fibroblast growth factor receptor-like 1                           |
| Pla2g2e       | phospholipase A2, group IIE                                        |
| Cfap52        | cilia and flagella associated protein 52                           |
| Gm49711       | predicted gene, 49711                                              |
| Aqp8          | aquaporin 8                                                        |
| Cyp2b13       | cytochrome P450, family 2, subfamily b, polypeptide 13             |
| Gprc5d        | G protein-coupled receptor, family C, group 5, member D            |
| Lrrc74b       | leucine rich repeat containing 74B                                 |
| Pdzd7         | PDZ domain containing 7                                            |
| Kctd16        | potassium channel tetramerisation domain containing 16             |
| Aloxe3        | arachidonate lipoxygenase 3                                        |
| Vmn1r33       | vomer nasal 1 receptor 33                                          |
| 1700001J03Rik | RIKEN cDNA 1700001J03 gene                                         |
| Taf7l         | TATA-box binding protein associated factor 7 like                  |
| Inhbe         | inhibin beta-E                                                     |
| 4930524B15Rik | RIKEN cDNA 4930524B15 gene                                         |
| Zfp185        | zinc finger protein 185                                            |
| Mkrn2os       | makorin, ring finger protein 2, opposite strand                    |
| Cth           | cystathionase (cystathionine gamma-lyase)                          |
| Gpr160        | G protein-coupled receptor 160                                     |
| Mfsd4b3       | major facilitator superfamily domain containing 4B3                |
| Gm19345       | predicted gene, 19345                                              |
| Ces5a         | carboxylesterase 5A                                                |
| BC048671      | cDNA sequence BC048671                                             |
| Lcp1          | lymphocyte cytosolic protein 1                                     |
| 1700123K08Rik | RIKEN cDNA 1700123K08 gene                                         |
| Il1rn         | interleukin 1 receptor antagonist                                  |
| Ceacam16      | carcinoembryonic antigen-related cell adhesion molecule 16         |
| Spaca9        | sperm acrosome associated 9                                        |
| A730049H05Rik | RIKEN cDNA A730049H05 gene                                         |
| Cmah          | cytidine monophospho-N-acetylneuraminic acid hydroxylase           |
| Sigirr        | single immunoglobulin and toll-interleukin 1 receptor (TIR) domain |
| Hvcn1         | hydrogen voltage-gated channel 1                                   |
| Hrk           | harakiri, BCL2 interacting protein (contains only BH3 domain)      |
| Plag1         | pleiomorphic adenoma gene 1                                        |
| Pnma5         | paraneoplastic antigen family 5                                    |
| Tmc3          | transmembrane channel-like gene family 3                           |
| Cox6a2        | cytochrome c oxidase subunit 6A2                                   |
| Stc2          | stanniocalcin 2                                                    |

|               |                                                                                             |
|---------------|---------------------------------------------------------------------------------------------|
| Ncf4          | neutrophil cytosolic factor 4                                                               |
| Irx1          | Iroquois homeobox 1                                                                         |
| Wt1           | Wilms tumor 1 homolog                                                                       |
| Fam129a       | family with sequence similarity 129, member A                                               |
| Steap1        | six transmembrane epithelial antigen of the prostate 1                                      |
| Gbx1          | gastrulation brain homeobox 1                                                               |
| Apobec1       | apolipoprotein B mRNA editing enzyme, catalytic polypeptide 1                               |
| Ddit3         | DNA-damage inducible transcript 3                                                           |
| Ostn          | osteocrin                                                                                   |
| Cfap58        | cilia and flagella associated protein 58                                                    |
| Itgb2         | integrin beta 2                                                                             |
| Ceacam3       | carcinoembryonic antigen-related cell adhesion molecule 3                                   |
| 1700016K19Rik | RIKEN cDNA 1700016K19 gene                                                                  |
| Gm43738       | predicted gene 43738                                                                        |
| Odf3l1        | outer dense fiber of sperm tails 3-like 1                                                   |
| Th            | tyrosine hydroxylase                                                                        |
| Gpr65         | G-protein coupled receptor 65                                                               |
| Olfir692      | olfactory receptor 692                                                                      |
| Atf3          | activating transcription factor 3                                                           |
| Atp2a3        | ATPase, Ca <sup>++</sup> transporting, ubiquitous                                           |
| Cd27          | CD27 antigen                                                                                |
| Creb5         | cAMP responsive element binding protein 5                                                   |
| Slc7a11       | solute carrier family 7 (cationic amino acid transporter, y <sup>+</sup> system), member 11 |
| Ptpn18        | protein tyrosine phosphatase, non-receptor type 18                                          |
| Scd4          | stearoyl-coenzyme A desaturase 4                                                            |
| Ascl3         | achaete-scute family bHLH transcription factor 3                                            |
| Angptl6       | angiopoietin-like 6                                                                         |
| Bpifb6        | BPI fold containing family B, member 6                                                      |
| Nupr1         | nuclear protein transcription regulator 1                                                   |
| Rab3il1       | RAB3A interacting protein (rabin3)-like 1                                                   |
| Olfir1507     | olfactory receptor 1507                                                                     |
| Lrrc10        | leucine rich repeat containing 10                                                           |
| Itk           | IL2 inducible T cell kinase                                                                 |
| Rorc          | RAR-related orphan receptor gamma                                                           |
| Gfral         | GDNF family receptor alpha like                                                             |
| Ascl2         | achaete-scute family bHLH transcription factor 2                                            |
| Pheta2        | PH domain containing endocytic trafficking adaptor 2                                        |
| Slc6a9        | solute carrier family 6 (neurotransmitter transporter, glycine), member 9                   |
| Il2rb         | interleukin 2 receptor, beta chain                                                          |
| Reep6         | receptor accessory protein 6                                                                |
| Ugt3a2        | UDP glycosyltransferases 3 family, polypeptide A2                                           |
| Foxb2         | forkhead box B2                                                                             |
| Samsn1        | SAM domain, SH3 domain and nuclear localization signals, 1                                  |
| Ncmap         | noncompact myelin associated protein                                                        |
| Aph1c         | aph1 homolog C, gamma secretase subunit                                                     |
| Fibcd1        | fibrinogen C domain containing 1                                                            |
| Klf15         | Kruppel-like factor 15                                                                      |
| Scel          | sciellin                                                                                    |
| Zfp13         | zinc finger protein 13                                                                      |
| Bhmt2         | betaine-homocysteine methyltransferase 2                                                    |
| Odf3          | outer dense fiber of sperm tails 3                                                          |
| Gm648         | predicted gene 648                                                                          |

|               |                                                                                    |
|---------------|------------------------------------------------------------------------------------|
| Fam84b        | family with sequence similarity 84, member B                                       |
| Rora          | RAR-related orphan receptor alpha                                                  |
| Fasl          | Fas ligand (TNF superfamily, member 6)                                             |
| Gpr132        | G protein-coupled receptor 132                                                     |
| Olf1349       | olfactory receptor 1349                                                            |
| Pnpla3        | patatin-like phospholipase domain containing 3                                     |
| Htr3b         | 5-hydroxytryptamine (serotonin) receptor 3B                                        |
| Mvd           | mevalonate (diphospho) decarboxylase                                               |
| Gch1          | GTP cyclohydrolase 1                                                               |
| Btc           | betacellulin, epidermal growth factor family member                                |
| Aqp9          | aquaporin 9                                                                        |
| Drp2          | dystrophin related protein 2                                                       |
| Nos2          | nitric oxide synthase 2, inducible                                                 |
| Fa2h          | fatty acid 2-hydroxylase                                                           |
| Vcam1         | vascular cell adhesion molecule 1                                                  |
| Gypa          | glycophorin A                                                                      |
| Csf2ra        | colony stimulating factor 2 receptor, alpha, low-affinity (granulocyte-macrophage) |
| Aqp7          | aquaporin 7                                                                        |
| Tnk1          | tyrosine kinase, non-receptor, 1                                                   |
| Olah          | oleoyl-ACP hydrolase                                                               |
| Traf3ip3      | TRAF3 interacting protein 3                                                        |
| Cdsn          | corneodesmosin                                                                     |
| Ptpn14        | protein tyrosine phosphatase, non-receptor type 14                                 |
| Celsr1        | cadherin, EGF LAG seven-pass G-type receptor 1                                     |
| Rhod          | ras homolog family member D                                                        |
| Apol10b       | apolipoprotein L 10B                                                               |
| Slc52a3       | solute carrier protein family 52, member 3                                         |
| 4833423E24Rik | RIKEN cDNA 4833423E24 gene                                                         |
| AA467197      | expressed sequence AA467197                                                        |
| Foxr1         | forkhead box R1                                                                    |
| Krt78         | keratin 78                                                                         |
| Hepacam       | hepatocyte cell adhesion molecule                                                  |
| Pi16          | peptidase inhibitor 16                                                             |
| Slc1a7        | solute carrier family 1 (glutamate transporter), member 7                          |
| Dtna          | dystrobrevin alpha                                                                 |
| Fgb           | fibrinogen beta chain                                                              |
| Grid2ip       | glutamate receptor, ionotropic, delta 2 (Grid2) interacting protein 1              |
| Zmynd10       | zinc finger, MYND domain containing 10                                             |
| Zcchc24       | zinc finger, CCHC domain containing 24                                             |
| Acox2         | acyl-Coenzyme A oxidase 2, branched chain                                          |
| Pdgfb         | platelet derived growth factor, B polypeptide                                      |
| Gm15319       | predicted gene 15319                                                               |
| Dlg2          | discs large MAGUK scaffold protein 2                                               |
| Calca         | calcitonin/calcitonin-related polypeptide, alpha                                   |
| Fam50b        | family with sequence similarity 50, member B                                       |
| Entpd3        | ectonucleoside triphosphate diphosphohydrolase 3                                   |
| Eln           | elastin                                                                            |
| Sowahb        | soyondowah ankyrin repeat domain family member B                                   |
| Gif           | gastric intrinsic factor                                                           |
| Fn3k          | fructosamine 3 kinase                                                              |
| Plch2         | phospholipase C, eta 2                                                             |
| Fam107a       | family with sequence similarity 107, member A                                      |

|               |                                                                             |
|---------------|-----------------------------------------------------------------------------|
| Isg20         | interferon-stimulated protein                                               |
| Insrr         | insulin receptor-related receptor                                           |
| Rspo1         | R-spondin 1                                                                 |
| Sh2d3c        | SH2 domain containing 3C                                                    |
| Dhh           | desert hedgehog                                                             |
| Gm28035       | predicted gene, 28035                                                       |
| Mettl27       | methyltransferase like 27                                                   |
| Hmx3          | H6 homeobox 3                                                               |
| Nrap          | nebulin-related anchoring protein                                           |
| Muc20         | mucin 20                                                                    |
| 6030468B19Rik | RIKEN cDNA 6030468B19 gene                                                  |
| Gpr171        | G protein-coupled receptor 171                                              |
| Cpt1b         | carnitine palmitoyltransferase 1b, muscle                                   |
| Pkd11         | polycystic kidney disease 1 like 1                                          |
| Rdh16         | retinol dehydrogenase 16                                                    |
| Fibin         | fin bud initiation factor homolog (zebrafish)                               |
| Cracr2a       | calcium release activated channel regulator 2A                              |
| Aldob         | aldolase B, fructose-bisphosphate                                           |
| Vipr2         | vasoactive intestinal peptide receptor 2                                    |
| Hgf           | hepatocyte growth factor                                                    |
| Trim66        | tripartite motif-containing 66                                              |
| Mib2          | mindbomb E3 ubiquitin protein ligase 2                                      |
| Pkdrej        | polycystin (PKD) family receptor for egg jelly                              |
| Gucy2e        | guanylate cyclase 2e                                                        |
| Vrtn          | vertebrae development associated                                            |
| Maff          | v-maf musculoaponeurotic fibrosarcoma oncogene family, protein F (avian)    |
| Ifi44         | interferon-induced protein 44                                               |
| Enpp6         | ectonucleotide pyrophosphatase/phosphodiesterase 6                          |
| Rgs8          | regulator of G-protein signaling 8                                          |
| Gabbr2        | gamma-aminobutyric acid (GABA) C receptor, subunit rho 2                    |
| Rsph4a        | radial spoke head 4 homolog A (Chlamydomonas)                               |
| Sdk2          | sidekick cell adhesion molecule 2                                           |
| Dll4          | delta like canonical Notch ligand 4                                         |
| Adtrp         | androgen dependent TFPI regulating protein                                  |
| Hmgcs1        | 3-hydroxy-3-methylglutaryl-Coenzyme A synthase 1                            |
| Lipc          | lipase, hepatic                                                             |
| Tuba3a        | tubulin, alpha 3A                                                           |
| N4bp2l1       | NEDD4 binding protein 2-like 1                                              |
| Sh3tc1        | SH3 domain and tetratricopeptide repeats 1                                  |
| Prlr          | prolactin receptor                                                          |
| Lss           | lanosterol synthase                                                         |
| Tnfrsf13c     | tumor necrosis factor receptor superfamily, member 13c                      |
| Trpv1         | transient receptor potential cation channel, subfamily V, member 1          |
| Gm10439       | predicted gene 10439                                                        |
| Olf330        | olfactory receptor 330                                                      |
| Fgfr4         | fibroblast growth factor receptor 4                                         |
| Zfp773        | zinc finger protein 773                                                     |
| Ifnlr1        | interferon lambda receptor 1                                                |
| Gypc          | glycophorin C                                                               |
| Rbpjl         | recombination signal binding protein for immunoglobulin kappa J region-like |
| Eno2          | enolase 2, gamma neuronal                                                   |
| Syt2          | synaptotagmin II                                                            |

|           |                                                                               |
|-----------|-------------------------------------------------------------------------------|
| Atp4a     | ATPase, H <sup>+</sup> /K <sup>+</sup> exchanging, gastric, alpha polypeptide |
| Styx1l    | serine/threonine/tyrosine interacting-like 1                                  |
| Ppargc1a  | peroxisome proliferative activated receptor, gamma, coactivator 1 alpha       |
| Sftpb     | surfactant associated protein B                                               |
| Samd4     | sterile alpha motif domain containing 4                                       |
| Ciart     | circadian associated repressor of transcription                               |
| Nectin4   | nectin cell adhesion molecule 4                                               |
| Ntrk3     | neurotrophic tyrosine kinase, receptor, type 3                                |
| Drc1      | dynein regulatory complex subunit 1                                           |
| Gad1      | glutamate decarboxylase 1                                                     |
| Cplx3     | complexin 3                                                                   |
| Ppp1r15a  | protein phosphatase 1, regulatory subunit 15A                                 |
| Rnf43     | ring finger protein 43                                                        |
| Grhl2     | grainyhead like transcription factor 2                                        |
| Vsig1     | V-set and immunoglobulin domain containing 1                                  |
| Olfir5    | olfactory receptor 5                                                          |
| Soat2     | sterol O-acyltransferase 2                                                    |
| Chac1     | ChaC, cation transport regulator 1                                            |
| Cd164l2   | CD164 sialomucin-like 2                                                       |
| Gramd2    | GRAM domain containing 2                                                      |
| Apobr     | apolipoprotein B receptor                                                     |
| Tnfrsf22  | tumor necrosis factor receptor superfamily, member 22                         |
| F3        | coagulation factor III                                                        |
| Slco1b2   | solute carrier organic anion transporter family, member 1b2                   |
| Idi1      | isopentenyl-diphosphate delta isomerase                                       |
| Olfir1508 | olfactory receptor 1508                                                       |
| Hhip1l    | hedgehog interacting protein-like 1                                           |
| Atp6v1b1  | ATPase, H <sup>+</sup> transporting, lysosomal V1 subunit B1                  |
| Ldlr      | low density lipoprotein receptor                                              |
| Shpk      | sedoheptulokinase                                                             |





















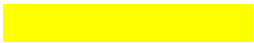



| Class          | RNA-seq   |           |       |       |        |        | Control_1 | Control_2 |
|----------------|-----------|-----------|-------|-------|--------|--------|-----------|-----------|
|                | Control_1 | Control_2 | TN_1  | TN_2  | CBZ_1  | CBZ_2  |           |           |
| protein_coding | 0.12      | 0.13      | 33.36 | 19.04 | 72.76  | 75.76  | 0.00      | 0.38      |
| protein_coding | 15.56     | 27.52     | 10.47 | 5.86  | 1.27   | 4.59   | 2.64      | 0.37      |
| protein_coding | 0.51      | 0.14      | 7.37  | 20.04 | 42.51  | 41.01  | 0.02      | 3.02      |
| protein_coding | 0.52      | 0.15      | 5.71  | 9.84  | 16.16  | 23.18  | 0.04      | 3.51      |
| protein_coding | 0.15      | 0.53      | 6.12  | 6.49  | 9.02   | 28.06  | 0.05      | 7.39      |
| protein_coding | 0.21      | 0.37      | 7.49  | 3.64  | 15.45  | 25.02  | 0.05      | 3.69      |
| protein_coding | 29.22     | 71.34     | 0.37  | 2.04  | 1.25   | 3.85   | 0.02      | 11.65     |
| protein_coding | 8.81      | 5.55      | 3.57  | 3.24  | 1.11   | 1.42   | 2.11      | 2.41      |
| protein_coding | 0.24      | 0.38      | 3.41  | 3.26  | 4.12   | 11.65  | 0.09      | 1.52      |
| protein_coding | 0.39      | 0.78      | 3.82  | 2.82  | 11.28  | 13.98  | 0.18      | 2.32      |
| protein_coding | 0.35      | 0.12      | 2.12  | 3.21  | 10.81  | 6.37   | 0.09      | 0.08      |
| protein_coding | 1.29      | 1.88      | 3.84  | 3.32  | 8.55   | 11.46  | 0.44      | 0.39      |
| protein_coding | 0.78      | 0.37      | 2.23  | 2.93  | 9.43   | 5.09   | 0.22      | 1.27      |
| protein_coding | 0.13      | 0.38      | 0.67  | 4.03  | 14.16  | 4.93   | 0.11      | 1.36      |
| protein_coding | 2.65      | 2.93      | 6.79  | 5.78  | 14.39  | 17.83  | 0.44      | 8.65      |
| protein_coding | 45.35     | 43.84     | 5.86  | 9.39  | 22.30  | 20.72  | 2.07      | 1.63      |
| protein_coding | 0.80      | 0.42      | 9.88  | 8.85  | 28.66  | 25.21  | 0.07      | 0.89      |
| protein_coding | 0.37      | 0.43      | 2.26  | 1.85  | 7.63   | 6.60   | 0.20      | 0.55      |
| protein_coding | 0.37      | 0.55      | 3.08  | 1.94  | 4.29   | 12.30  | 0.18      | 2.46      |
| protein_coding | 0.75      | 0.14      | 8.70  | 5.11  | 25.75  | 21.62  | 0.06      | 1.51      |
| protein_coding | 0.19      | 0.87      | 1.78  | 1.39  | 3.72   | 4.12   | 0.33      | 7.58      |
| protein_coding | 3.13      | 3.83      | 1.11  | 1.65  | 0.37   | 0.31   | 2.52      | 9.62      |
| protein_coding | 1.12      | 0.78      | 17.52 | 1.22  | 37.39  | 40.12  | 0.10      | 7.76      |
| protein_coding | 3.15      | 4.70      | 42.48 | 0.53  | 2.20   | 3.98   | 0.10      | 10.13     |
| protein_coding | 2.79      | 2.43      | 5.22  | 1.74  | 7.22   | 3.92   | 0.07      | 3.12      |
| protein_coding | 1.26      | 0.12      | 2.46  | 1.91  | 5.91   | 7.83   | 0.32      | 11.17     |
| protein_coding | 1.13      | 0.87      | 2.88  | 15.10 | 38.14  | 31.49  | 0.11      | 12.76     |
| protein_coding | 53.37     | 49.93     | 16.61 | 18.76 | 5.65   | 5.13   | 2.92      | 1.01      |
| protein_coding | 0.82      | 0.53      | 2.12  | 0.75  | 1.80   | 7.94   | 0.47      | 13.81     |
| protein_coding | 0.73      | 0.64      | 1.33  | 1.52  | 1.41   | 4.91   | 0.48      | 4.70      |
| protein_coding | 0.37      | 0.51      | 0.33  | 2.32  | 7.46   | 5.94   | 0.33      | 2.43      |
| protein_coding | 7.05      | 4.23      | 42.93 | 26.72 | 92.95  | 103.47 | 0.16      | 1.97      |
| protein_coding | 0.21      | 1.21      | 1.98  | 0.67  | 3.34   | 5.19   | 0.54      | 13.92     |
| protein_coding | 0.14      | 4.12      | 4.54  | 5.68  | 13.14  | 14.31  | 0.42      | 1.41      |
| protein_coding | 0.35      | 0.21      | 1.63  | 1.01  | 5.19   | 4.95   | 0.21      | 2.95      |
| protein_coding | 6.06      | 3.87      | 11.92 | 13.81 | 22.78  | 34.64  | 0.39      | 1.37      |
| protein_coding | 5.07      | 5.82      | 0.73  | 0.36  | 2.30   | 0.78   | 0.35      | 0.34      |
| protein_coding | 0.83      | 0.38      | 1.85  | 0.54  | 4.05   | 10.22  | 0.51      | 3.80      |
| protein_coding | 1.87      | 2.24      | 23.77 | 20.28 | 46.99  | 55.09  | 0.09      | 1.31      |
| protein_coding | 3.64      | 4.59      | 36.95 | 51.31 | 2.05   | 9.09   | 0.09      | 17.56     |
| protein_coding | 0.67      | 0.87      | 0.91  | 0.61  | 1.69   | 2.49   | 1.02      | 0.65      |
| protein_coding | 6.33      | 0.93      | 9.84  | 57.62 | 333.16 | 361.44 | 0.11      | 45.33     |
| protein_coding | 70.23     | 70.25     | 33.09 | 33.39 | 15.32  | 16.13  | 2.11      | 5.97      |
| protein_coding | 1.37      | 2.35      | 1.40  | 0.61  | 2.18   | 4.81   | 1.85      | 3.98      |
| protein_coding | 0.34      | 0.37      | 1.56  | 0.27  | 3.84   | 10.30  | 0.39      | 1.64      |
| protein_coding | 3.80      | 2.77      | 20.16 | 17.56 | 40.71  | 42.24  | 0.17      | 2.18      |
| protein_coding | 0.82      | 0.73      | 1.15  | 0.65  | 1.51   | 3.96   | 0.86      | 3.84      |
| protein_coding | 7.26      | 0.84      | 31.70 | 25.93 | 72.37  | 82.59  | 0.14      | 2.31      |
| protein_coding | 14.94     | 21.13     | 6.85  | 8.40  | 0.32   | 3.86   | 2.37      | 0.67      |
| protein_coding | 1.49      | 1.06      | 10.36 | 8.69  | 23.34  | 23.33  | 0.13      | 5.68      |

|                |        |        |        |        |        |        |      |       |
|----------------|--------|--------|--------|--------|--------|--------|------|-------|
| protein_coding | 0.32   | 0.37   | 1.15   | 0.34   | 3.29   | 2.06   | 0.47 | 3.20  |
| protein_coding | 366.13 | 341.39 | 93.04  | 126.58 | 5.68   | 6.89   | 3.22 | 3.80  |
| protein_coding | 0.10   | 0.44   | 1.06   | 0.38   | 2.66   | 1.99   | 0.37 | 0.82  |
| protein_coding | 7.14   | 5.18   | 29.19  | 54.49  | 126.86 | 129.07 | 0.15 | 7.26  |
| protein_coding | 1.87   | 1.63   | 19.81  | 3.50   | 45.38  | 33.87  | 0.15 | 2.77  |
| protein_coding | 1.11   | 0.37   | 5.22   | 2.79   | 13.72  | 9.38   | 0.18 | 1.36  |
| protein_coding | 18.15  | 23.26  | 8.78   | 10.35  | 3.86   | 3.73   | 2.16 | 5.85  |
| protein_coding | 6.19   | 5.07   | 22.96  | 51.02  | 150.48 | 123.77 | 0.15 | 9.17  |
| protein_coding | 18.64  | 19.69  | 141.48 | 109.07 | 352.90 | 378.07 | 0.15 | 0.53  |
| protein_coding | 3.99   | 3.98   | 8.49   | 10.17  | 18.51  | 23.65  | 0.43 | 39.23 |
| protein_coding | 5.25   | 5.85   | 45.31  | 26.65  | 320.17 | 333.82 | 0.15 | 2.76  |
| protein_coding | 10.99  | 8.43   | 4.28   | 4.81   | 1.21   | 1.63   | 2.14 | 6.28  |
| protein_coding | 2.66   | 0.35   | 6.28   | 11.26  | 30.24  | 38.27  | 0.17 | 4.44  |
| protein_coding | 19.84  | 16.07  | 8.60   | 2.93   | 1.11   | 1.70   | 3.11 | 5.37  |
| protein_coding | 0.24   | 0.37   | 0.71   | 0.53   | 2.25   | 1.14   | 0.49 | 2.86  |
| protein_coding | 3.30   | 9.30   | 38.51  | 39.23  | 90.71  | 100.74 | 0.16 | 2.66  |
| protein_coding | 0.37   | 0.71   | 0.73   | 0.44   | 3.05   | 2.49   | 0.92 | 19.84 |
| protein_coding | 0.37   | 1.07   | 1.27   | 5.13   | 11.14  | 13.99  | 0.22 | 0.24  |
| protein_coding | 4.43   | 1.82   | 14.33  | 18.37  | 56.01  | 56.97  | 0.19 | 13.72 |
| protein_coding | 0.54   | 0.95   | 0.75   | 0.84   | 2.64   | 12.02  | 0.94 | 6.69  |
| protein_coding | 2.96   | 3.64   | 7.59   | 7.50   | 14.62  | 17.83  | 0.44 | 2.53  |
| protein_coding | 0.60   | 0.83   | 2.08   | 1.22   | 8.30   | 1.26   | 0.43 | 2.49  |
| protein_coding | 22.21  | 64.65  | 19.27  | 19.41  | 7.83   | 6.83   | 2.25 | 5.55  |
| protein_coding | 3.85   | 0.65   | 6.20   | 10.70  | 23.88  | 23.43  | 0.27 | 0.89  |
| protein_coding | 0.45   | 0.46   | 1.18   | 0.54   | 4.34   | 1.63   | 0.53 | 5.38  |
| protein_coding | 14.64  | 14.97  | 52.90  | 66.56  | 132.27 | 143.59 | 0.25 | 4.50  |
| protein_coding | 2.23   | 2.25   | 8.46   | 9.28   | 22.42  | 22.38  | 0.25 | 4.14  |
| protein_coding | 2.83   | 1.70   | 9.35   | 6.78   | 38.49  | 42.61  | 0.28 | 7.51  |
| protein_coding | 83.18  | 71.83  | 32.75  | 32.92  | 12.88  | 17.47  | 2.36 | 2.28  |
| protein_coding | 8.60   | 2.85   | 26.85  | 15.56  | 47.34  | 65.55  | 0.27 | 0.47  |
| protein_coding | 42.88  | 39.73  | 19.94  | 19.17  | 9.46   | 8.29   | 2.11 | 3.69  |
| protein_coding | 1.20   | 1.33   | 4.02   | 5.17   | 11.76  | 11.63  | 0.28 | 1.84  |
| protein_coding | 25.04  | 30.66  | 10.49  | 7.98   | 2.81   | 4.64   | 3.01 | 4.65  |
| protein_coding | 3.35   | 2.37   | 12.44  | 8.05   | 35.79  | 37.72  | 0.28 | 0.54  |
| protein_coding | 2.99   | 2.73   | 9.91   | 9.35   | 20.41  | 24.07  | 0.30 | 2.62  |
| protein_coding | 0.35   | 0.54   | 0.29   | 0.55   | 0.71   | 1.71   | 1.06 | 1.47  |
| protein_coding | 1.34   | 1.88   | 3.60   | 7.47   | 13.73  | 17.64  | 0.29 | 1.86  |
| protein_coding | 0.54   | 4.11   | 6.15   | 8.09   | 17.95  | 21.23  | 0.33 | 1.63  |
| protein_coding | 15.22  | 16.55  | 7.87   | 7.94   | 2.82   | 4.74   | 2.01 | 6.88  |
| protein_coding | 1.12   | 2.85   | 4.97   | 8.45   | 25.14  | 23.22  | 0.30 | 7.52  |
| protein_coding | 0.54   | 0.91   | 1.82   | 1.47   | 4.46   | 10.97  | 0.44 | 8.60  |
| protein_coding | 24.31  | 10.68  | 3.83   | 5.39   | 0.76   | 2.31   | 3.80 | 3.54  |
| protein_coding | 0.54   | 4.48   | 7.89   | 6.97   | 18.65  | 17.68  | 0.34 | 2.75  |
| protein_coding | 2.98   | 1.24   | 6.05   | 7.13   | 10.39  | 19.76  | 0.32 | 2.68  |
| protein_coding | 2.82   | 2.73   | 9.28   | 7.96   | 19.73  | 23.94  | 0.32 | 30.92 |
| protein_coding | 9.85   | 3.02   | 13.76  | 15.94  | 45.44  | 31.11  | 0.43 | 2.85  |
| protein_coding | 7.52   | 8.42   | 30.83  | 17.90  | 69.92  | 70.63  | 0.33 | 4.50  |
| protein_coding | 3.79   | 2.69   | 9.81   | 9.48   | 8.71   | 33.11  | 0.34 | 1.33  |
| protein_coding | 3.09   | 3.82   | 11.44  | 19.08  | 39.45  | 43.68  | 0.23 | 1.17  |
| protein_coding | 1.70   | 1.99   | 5.81   | 5.11   | 12.53  | 14.84  | 0.34 | 5.81  |
| protein_coding | 1.32   | 0.65   | 1.57   | 2.63   | 7.16   | 8.00   | 0.47 | 2.04  |
| protein_coding | 7.64   | 3.03   | 14.17  | 12.42  | 38.34  | 30.75  | 0.40 | 0.98  |

|                |        |        |        |        |        |        |      |        |
|----------------|--------|--------|--------|--------|--------|--------|------|--------|
| protein_coding | 1.91   | 4.83   | 7.36   | 7.99   | 46.04  | 42.48  | 0.44 | 4.02   |
| protein_coding | 2.74   | 4.41   | 10.44  | 9.97   | 21.15  | 20.60  | 0.35 | 11.27  |
| protein_coding | 0.87   | 1.23   | 1.37   | 2.28   | 9.09   | 3.43   | 0.58 | 4.22   |
| protein_coding | 12.36  | 13.99  | 6.07   | 3.85   | 0.39   | 0.88   | 2.66 | 5.29   |
| protein_coding | 1.46   | 7.60   | 13.72  | 11.15  | 29.97  | 30.27  | 0.36 | 4.58   |
| protein_coding | 6.85   | 5.34   | 14.66  | 18.71  | 39.75  | 53.07  | 0.37 | 17.47  |
| protein_coding | 0.74   | 6.07   | 7.17   | 9.49   | 21.59  | 22.78  | 0.41 | 10.23  |
| protein_coding | 1.82   | 2.92   | 5.90   | 6.73   | 15.69  | 15.84  | 0.38 | 0.10   |
| protein_coding | 5.05   | 5.03   | 14.92  | 17.51  | 42.06  | 32.14  | 0.31 | 4.65   |
| protein_coding | 50.34  | 45.12  | 117.99 | 135.32 | 314.03 | 237.66 | 0.38 | 1.69   |
| protein_coding | 1.27   | 1.19   | 3.56   | 2.90   | 8.23   | 6.19   | 0.38 | 23.79  |
| protein_coding | 17.87  | 13.28  | 7.01   | 3.44   | 0.88   | 2.18   | 2.98 | 1.44   |
| protein_coding | 0.45   | 0.55   | 2.39   | 1.01   | 5.10   | 7.95   | 0.29 | 1.48   |
| protein_coding | 3.29   | 1.82   | 8.17   | 5.11   | 18.51  | 17.29  | 0.38 | 6.56   |
| protein_coding | 4.80   | 5.31   | 10.51  | 15.71  | 59.58  | 59.17  | 0.39 | 0.10   |
| protein_coding | 6.61   | 6.98   | 2.68   | 1.59   | 0.54   | 0.97   | 3.17 | 8.43   |
| protein_coding | 3.86   | 3.01   | 10.88  | 6.87   | 33.56  | 35.35  | 0.39 | 6.21   |
| protein_coding | 11.89  | 5.92   | 22.30  | 22.49  | 41.22  | 49.14  | 0.40 | 3.90   |
| protein_coding | 4.44   | 3.53   | 10.69  | 9.32   | 19.04  | 29.48  | 0.40 | 9.22   |
| protein_coding | 8.05   | 5.67   | 15.76  | 18.59  | 38.80  | 38.29  | 0.40 | 5.73   |
| protein_coding | 0.37   | 2.06   | 5.43   | 2.91   | 16.88  | 10.07  | 0.29 | 6.98   |
| protein_coding | 0.87   | 0.75   | 0.22   | 0.28   | 0.51   | 0.74   | 3.25 | 1.75   |
| protein_coding | 14.37  | 21.38  | 43.38  | 44.99  | 103.04 | 79.32  | 0.40 | 1.34   |
| protein_coding | 7.16   | 4.77   | 17.44  | 28.48  | 62.70  | 68.20  | 0.26 | 2.63   |
| protein_coding | 18.10  | 14.07  | 40.66  | 38.06  | 74.48  | 88.14  | 0.41 | 10.28  |
| protein_coding | 0.77   | 0.79   | 0.29   | 0.71   | 0.87   | 0.60   | 1.55 | 10.44  |
| protein_coding | 6.03   | 2.29   | 9.73   | 10.20  | 24.38  | 19.13  | 0.42 | 3.37   |
| protein_coding | 522.46 | 487.72 | 24.55  | 168.79 | 13.91  | 10.65  | 5.22 | 5.52   |
| protein_coding | 0.42   | 0.73   | 0.77   | 2.18   | 5.95   | 2.79   | 0.39 | 3.42   |
| protein_coding | 1.97   | 7.74   | 12.55  | 10.56  | 29.46  | 21.24  | 0.42 | 2.23   |
| protein_coding | 13.62  | 11.40  | 29.91  | 29.17  | 59.63  | 69.46  | 0.42 | 4.13   |
| protein_coding | 35.58  | 35.39  | 77.23  | 88.72  | 246.14 | 242.34 | 0.43 | 7.01   |
| protein_coding | 22.74  | 27.32  | 12.17  | 12.45  | 8.07   | 3.46   | 2.03 | 17.90  |
| protein_coding | 1.29   | 1.37   | 0.32   | 0.21   | 0.74   | 0.73   | 4.99 | 5.20   |
| protein_coding | 7.32   | 5.33   | 1.29   | 1.05   | 0.32   | 0.77   | 5.42 | 7.48   |
| protein_coding | 26.07  | 17.83  | 7.90   | 10.85  | 5.44   | 2.32   | 2.34 | 135.90 |
| protein_coding | 2.82   | 3.29   | 6.15   | 7.78   | 16.40  | 14.88  | 0.44 | 24.42  |
| protein_coding | 1.56   | 0.55   | 2.17   | 2.12   | 4.96   | 5.00   | 0.49 | 22.53  |
| protein_coding | 0.76   | 0.67   | 1.94   | 0.61   | 4.59   | 5.18   | 0.56 | 11.09  |
| protein_coding | 3.67   | 3.31   | 7.34   | 8.32   | 22.77  | 22.61  | 0.45 | 55.75  |
| protein_coding | 0.35   | 0.75   | 2.12   | 0.81   | 6.07   | 11.82  | 0.38 | 75.61  |
| protein_coding | 6.44   | 0.78   | 6.93   | 7.42   | 18.18  | 16.64  | 0.50 | 195.66 |
| protein_coding | 4.99   | 7.33   | 37.28  | 25.23  | 103.16 | 114.85 | 0.20 | 56.13  |
| protein_coding | 3.00   | 8.33   | 11.63  | 13.21  | 31.03  | 26.18  | 0.46 | 30.82  |
| protein_coding | 1.71   | 1.58   | 10.99  | 14.38  | 35.86  | 37.67  | 0.13 | 14.51  |
| protein_coding | 0.97   | 2.23   | 2.93   | 3.46   | 9.18   | 7.53   | 0.50 | 36.99  |
| protein_coding | 1.32   | 0.87   | 2.23   | 2.43   | 4.06   | 7.22   | 0.47 | 190.37 |
| protein_coding | 27.27  | 36.41  | 15.86  | 15.87  | 5.42   | 10.23  | 2.01 | 45.25  |
| protein_coding | 8.23   | 10.74  | 3.17   | 2.33   | 0.68   | 0.53   | 3.45 | 19.33  |
| protein_coding | 0.86   | 1.07   | 0.26   | 0.23   | 0.61   | 0.83   | 3.97 | 18.64  |
| protein_coding | 45.25  | 29.17  | 18.43  | 18.25  | 9.07   | 7.81   | 2.03 | 30.63  |
| protein_coding | 0.43   | 0.43   | 4.20   | 7.88   | 11.78  | 20.37  | 0.07 | 57.69  |

|                |         |         |         |        |        |        |      |         |
|----------------|---------|---------|---------|--------|--------|--------|------|---------|
| protein_coding | 27.43   | 21.87   | 12.02   | 12.14  | 5.61   | 5.45   | 2.04 | 25.45   |
| protein_coding | 16.79   | 17.02   | 8.23    | 8.32   | 4.73   | 3.42   | 2.04 | 4.11    |
| protein_coding | 10.67   | 8.82    | 4.68    | 4.86   | 1.33   | 2.87   | 2.04 | 11.50   |
| protein_coding | 11.30   | 10.93   | 3.12    | 1.64   | 0.78   | 1.20   | 4.66 | 57.30   |
| protein_coding | 39.83   | 32.44   | 17.40   | 17.74  | 8.75   | 6.07   | 2.06 | 33.88   |
| protein_coding | 133.82  | 110.03  | 58.43   | 58.27  | 26.74  | 26.46  | 2.09 | 20.78   |
| protein_coding | 163.61  | 183.20  | 46.41   | 76.63  | 14.81  | 10.20  | 2.82 | 4.23    |
| protein_coding | 5.01    | 3.40    | 1.86    | 2.00   | 0.76   | 1.08   | 2.18 | 21.12   |
| protein_coding | 398.48  | 354.06  | 81.56   | 112.01 | 0.61   | 1.53   | 3.89 | 2.47    |
| protein_coding | 48.46   | 54.98   | 24.66   | 23.97  | 8.35   | 13.29  | 2.13 | 187.37  |
| protein_coding | 29.10   | 28.59   | 13.03   | 13.78  | 5.07   | 6.51   | 2.15 | 75.56   |
| protein_coding | 36.99   | 42.18   | 17.99   | 18.71  | 6.58   | 11.00  | 2.16 | 72.34   |
| protein_coding | 56.19   | 59.80   | 6.48    | 6.95   | 3.27   | 2.75   | 8.63 | 366.00  |
| protein_coding | 79.17   | 85.14   | 36.90   | 38.03  | 19.00  | 16.55  | 2.19 | 18.82   |
| protein_coding | 7.03    | 6.40    | 40.82   | 43.70  | 105.87 | 89.11  | 0.16 | 19.58   |
| protein_coding | 19.29   | 12.48   | 7.62    | 6.99   | 6.73   | 0.87   | 2.17 | 30.71   |
| protein_coding | 0.45    | 0.74    | 0.52    | 1.89   | 2.94   | 8.24   | 0.50 | 37.46   |
| protein_coding | 41.84   | 41.18   | 18.63   | 19.53  | 10.46  | 7.14   | 2.18 | 9.89    |
| protein_coding | 0.37    | 0.53    | 0.89    | 2.27   | 12.80  | 10.51  | 0.29 | 43.45   |
| protein_coding | 28.96   | 33.95   | 14.07   | 14.60  | 6.07   | 7.81   | 2.19 | 12.57   |
| protein_coding | 2058.01 | 2271.99 | 1038.72 | 929.27 | 0.77   | 9.81   | 2.20 | 55.88   |
| protein_coding | 0.71    | 0.63    | 0.91    | 0.32   | 4.00   | 1.56   | 1.09 | 23.70   |
| protein_coding | 32.85   | 27.00   | 13.06   | 14.01  | 5.73   | 2.59   | 2.21 | 20.42   |
| protein_coding | 74.95   | 74.01   | 32.14   | 35.24  | 13.65  | 12.73  | 2.21 | 33.02   |
| protein_coding | 19.42   | 13.92   | 4.59    | 6.38   | 1.70   | 2.65   | 3.04 | 44.11   |
| protein_coding | 53.37   | 49.93   | 21.83   | 24.29  | 5.65   | 5.13   | 2.24 | 17.12   |
| protein_coding | 2.90    | 3.45    | 16.59   | 28.54  | 81.93  | 110.73 | 0.14 | 22.02   |
| protein_coding | 25.59   | 16.48   | 10.06   | 8.49   | 4.12   | 3.91   | 2.27 | 2.27    |
| protein_coding | 5.44    | 13.59   | 4.31    | 4.03   | 0.73   | 1.91   | 2.28 | 30.46   |
| protein_coding | 4.38    | 3.79    | 9.19    | 13.50  | 41.62  | 40.80  | 0.36 | 134.28  |
| protein_coding | 79.17   | 51.55   | 27.87   | 29.36  | 13.07  | 11.49  | 2.28 | 13.13   |
| protein_coding | 92.77   | 104.28  | 39.81   | 45.53  | 21.87  | 15.20  | 2.31 | 165.89  |
| protein_coding | 1.62    | 1.89    | 0.68    | 0.83   | 0.21   | 0.43   | 2.31 | 10.78   |
| protein_coding | 18.28   | 14.68   | 7.16    | 7.11   | 3.62   | 3.23   | 2.31 | 30.44   |
| protein_coding | 8.17    | 9.42    | 3.28    | 4.31   | 20.72  | 10.51  | 2.32 | 12.95   |
| protein_coding | 19.94   | 15.18   | 6.96    | 8.14   | 2.11   | 4.26   | 2.33 | 1003.78 |
| protein_coding | 64.40   | 61.78   | 27.92   | 25.86  | 11.38  | 14.24  | 2.35 | 34.76   |
| protein_coding | 3.21    | 1.31    | 1.63    | 1.79   | 6.15   | 10.13  | 1.32 | 24.56   |
| protein_coding | 9.85    | 13.27   | 5.09    | 4.74   | 2.13   | 1.23   | 2.35 | 27.27   |
| protein_coding | 2.50    | 3.80    | 1.32    | 1.35   | 4.23   | 2.13   | 2.36 | 57.04   |
| protein_coding | 106.42  | 114.10  | 22.53   | 55.13  | 1.49   | 5.24   | 2.84 | 79.13   |
| protein_coding | 41.89   | 42.45   | 15.03   | 20.30  | 7.69   | 6.94   | 2.39 | 6.00    |
| protein_coding | 22.85   | 35.23   | 11.73   | 12.52  | 3.41   | 8.14   | 2.39 | 6.67    |
| protein_coding | 3.80    | 79.88   | 16.58   | 18.35  | 4.09   | 7.16   | 2.40 | 21.36   |
| protein_coding | 0.46    | 0.43    | 6.10    | 12.00  | 33.52  | 17.57  | 0.05 | 6.91    |
| protein_coding | 3.93    | 2.35    | 1.04    | 1.57   | 1.25   | 1.37   | 2.41 | 48.43   |
| protein_coding | 41.04   | 42.32   | 16.71   | 17.83  | 1.51   | 0.92   | 2.41 | 29.45   |
| protein_coding | 8.78    | 9.02    | 4.03    | 3.33   | 2.79   | 1.58   | 2.42 | 811.44  |
| protein_coding | 34.36   | 35.42   | 13.95   | 14.71  | 6.23   | 6.59   | 2.43 | 31.08   |
| protein_coding | 1.89    | 2.40    | 3.72    | 0.95   | 8.23   | 13.49  | 0.92 | 104.47  |
| protein_coding | 12.35   | 27.36   | 7.26    | 9.01   | 2.27   | 4.22   | 2.44 | 42.31   |
| protein_coding | 0.98    | 3.97    | 1.12    | 0.91   | 0.30   | 0.10   | 2.44 | 93.55   |

|                |        |        |       |       |       |       |      |        |
|----------------|--------|--------|-------|-------|-------|-------|------|--------|
| protein_coding | 31.90  | 40.29  | 12.83 | 16.74 | 4.41  | 2.98  | 2.44 | 27.96  |
| protein_coding | 38.87  | 43.90  | 16.60 | 17.08 | 5.35  | 7.64  | 2.46 | 6.43   |
| protein_coding | 34.05  | 42.87  | 3.65  | 4.95  | 2.39  | 0.94  | 8.95 | 22.69  |
| protein_coding | 44.81  | 53.30  | 18.46 | 21.41 | 7.83  | 9.07  | 2.46 | 29.41  |
| protein_coding | 16.79  | 19.38  | 3.81  | 7.60  | 1.53  | 3.29  | 3.17 | 1.84   |
| protein_coding | 24.76  | 32.05  | 12.07 | 10.52 | 2.16  | 2.54  | 2.52 | 37.09  |
| protein_coding | 34.36  | 35.42  | 13.29 | 14.24 | 6.23  | 6.59  | 2.53 | 15.97  |
| protein_coding | 5.60   | 2.56   | 1.25  | 1.96  | 0.70  | 0.42  | 2.54 | 15.38  |
| protein_coding | 7.25   | 6.72   | 1.01  | 1.34  | 0.01  | 1.40  | 5.95 | 18.92  |
| protein_coding | 40.94  | 30.12  | 10.40 | 17.60 | 5.91  | 3.66  | 2.54 | 36.32  |
| protein_coding | 62.06  | 50.20  | 27.76 | 16.33 | 8.83  | 4.49  | 2.55 | 610.73 |
| protein_coding | 123.57 | 124.84 | 41.75 | 54.98 | 18.65 | 18.52 | 2.57 | 11.02  |
| protein_coding | 2.71   | 0.68   | 4.72  | 3.77  | 7.80  | 12.82 | 0.40 | 43.76  |
| protein_coding | 8.05   | 8.83   | 4.10  | 2.48  | 0.05  | 1.07  | 2.57 | 14.82  |
| protein_coding | 107.79 | 116.62 | 44.73 | 41.63 | 1.39  | 5.36  | 2.60 | 44.81  |
| protein_coding | 0.87   | 1.07   | 0.47  | 0.27  | 2.64  | 2.67  | 2.63 | 31.67  |
| protein_coding | 177.04 | 213.91 | 32.80 | 42.90 | 12.28 | 14.75 | 5.16 | 67.93  |
| protein_coding | 64.93  | 64.36  | 30.61 | 25.75 | 9.46  | 8.86  | 2.29 | 21.44  |
| protein_coding | 1.37   | 2.51   | 0.56  | 0.89  | 1.70  | 2.40  | 2.67 | 661.19 |
| protein_coding | 99.83  | 85.67  | 37.04 | 31.10 | 2.80  | 1.99  | 2.72 | 2.30   |
| protein_coding | 14.09  | 12.74  | 5.84  | 4.37  | 2.62  | 0.82  | 2.63 | 28.77  |
| protein_coding | 2.18   | 2.22   | 0.99  | 0.62  | 3.55  | 1.33  | 2.73 | 11.45  |
| protein_coding | 82.65  | 84.98  | 34.90 | 26.14 | 12.09 | 8.36  | 2.75 | 24.27  |
| protein_coding | 7.46   | 6.05   | 3.06  | 1.79  | 0.31  | 0.85  | 2.78 | 154.81 |
| protein_coding | 13.76  | 12.61  | 6.00  | 5.28  | 2.08  | 1.31  | 2.34 | 34.54  |
| protein_coding | 13.18  | 27.90  | 9.63  | 5.00  | 3.05  | 0.91  | 2.81 | 28.93  |
| protein_coding | 62.72  | 52.54  | 19.51 | 21.44 | 7.23  | 5.87  | 2.81 | 380.42 |
| protein_coding | 13.62  | 11.68  | 5.07  | 3.90  | 1.78  | 0.71  | 2.82 | 33.51  |
| protein_coding | 0.01   | 0.54   | 0.53  | 0.68  | 2.41  | 1.09  | 0.45 | 64.83  |
| protein_coding | 23.40  | 22.04  | 8.63  | 7.26  | 3.19  | 2.59  | 2.86 | 45.76  |
| protein_coding | 4.64   | 4.55   | 13.16 | 13.56 | 27.68 | 28.53 | 0.34 | 69.78  |
| protein_coding | 1.98   | 4.16   | 1.13  | 1.02  | 0.85  | 1.33  | 2.86 | 40.94  |
| protein_coding | 1.10   | 2.66   | 7.75  | 4.47  | 13.13 | 20.85 | 0.31 | 0.70   |
| protein_coding | 88.85  | 102.03 | 38.17 | 27.68 | 10.85 | 13.49 | 2.90 | 31.08  |
| protein_coding | 5.80   | 0.78   | 0.67  | 0.32  | 3.25  | 1.92  | 6.65 | 2.88   |
| protein_coding | 9.46   | 10.21  | 3.72  | 2.98  | 1.70  | 0.95  | 2.94 | 24.83  |
| protein_coding | 61.66  | 42.59  | 14.68 | 20.37 | 7.00  | 3.58  | 2.97 | 0.96   |
| protein_coding | 18.10  | 14.07  | 38.06 | 32.17 | 74.48 | 88.14 | 0.46 | 41.78  |
| protein_coding | 91.68  | 130.75 | 28.79 | 44.29 | 10.95 | 15.46 | 3.04 | 17.28  |
| protein_coding | 24.62  | 20.81  | 9.25  | 7.05  | 3.59  | 3.08  | 2.79 | 51.73  |
| protein_coding | 176.88 | 189.71 | 53.03 | 62.30 | 7.59  | 8.37  | 3.18 | 5.06   |
| protein_coding | 29.09  | 20.12  | 0.60  | 10.60 | 3.25  | 0.26  | 4.39 | 67.45  |
| protein_coding | 129.85 | 141.48 | 44.71 | 38.29 | 2.43  | 2.47  | 3.27 | 63.79  |
| protein_coding | 3.30   | 5.46   | 15.17 | 17.12 | 44.98 | 44.67 | 0.27 | 33.42  |
| protein_coding | 2.26   | 1.85   | 0.91  | 0.33  | 1.86  | 1.36  | 3.30 | 18.98  |
| protein_coding | 4.83   | 11.75  | 2.13  | 2.77  | 0.83  | 2.38  | 3.38 | 4.19   |
| protein_coding | 6.86   | 4.67   | 1.90  | 1.51  | 1.37  | 0.08  | 3.38 | 100.89 |
| protein_coding | 3.70   | 2.70   | 1.11  | 0.74  | 2.63  | 0.10  | 3.45 | 1.67   |
| protein_coding | 49.80  | 37.55  | 14.23 | 8.44  | 1.34  | 2.75  | 3.85 | 161.72 |
| protein_coding | 6.47   | 0.00   | 8.20  | 12.21 | 29.02 | 21.84 | 0.32 | 8.46   |
| protein_coding | 32.90  | 24.69  | 7.06  | 9.30  | 0.82  | 3.60  | 3.52 | 26.36  |
| protein_coding | 8.84   | 13.84  | 2.66  | 3.71  | 0.08  | 2.14  | 3.56 | 3.08   |

|                |         |         |        |        |        |        |      |        |
|----------------|---------|---------|--------|--------|--------|--------|------|--------|
| protein_coding | 3.14    | 0.01    | 8.00   | 3.52   | 17.26  | 22.33  | 0.27 | 1.63   |
| protein_coding | 16.82   | 15.21   | 4.67   | 4.32   | 0.71   | 1.65   | 3.56 | 214.95 |
| protein_coding | 4.28    | 6.84    | 0.41   | 2.67   | 0.53   | 0.33   | 3.60 | 355.12 |
| protein_coding | 1222.21 | 1274.04 | 582.30 | 587.74 | 280.84 | 298.73 | 2.13 | 36.48  |
| protein_coding | 55.49   | 37.21   | 6.72   | 18.03  | 2.10   | 4.27   | 3.74 | 12.07  |
| protein_coding | 78.30   | 77.79   | 21.09  | 20.26  | 9.74   | 8.85   | 3.78 | 6.52   |
| protein_coding | 1.92    | 2.37    | 0.64   | 0.27   | 2.32   | 3.25   | 4.68 | 4.03   |
| protein_coding | 5.94    | 5.11    | 1.72   | 1.19   | 1.51   | 1.68   | 3.80 | 13.02  |
| protein_coding | 8.74    | 12.15   | 3.69   | 2.05   | 4.35   | 3.58   | 3.65 | 17.11  |
| protein_coding | 166.55  | 162.34  | 25.49  | 59.01  | 9.41   | 9.63   | 3.89 | 20.16  |
| protein_coding | 61.12   | 71.75   | 9.45   | 23.36  | 2.68   | 2.13   | 4.05 | 12.61  |
| protein_coding | 194.90  | 176.19  | 30.69  | 58.47  | 7.68   | 5.04   | 4.16 | 3.80   |
| protein_coding | 0.05    | 0.65    | 0.81   | 1.26   | 3.61   | 1.80   | 0.34 | 25.59  |
| protein_coding | 78.89   | 71.93   | 18.96  | 15.21  | 5.55   | 5.91   | 4.41 | 2.89   |
| protein_coding | 78.89   | 72.51   | 11.46  | 19.54  | 5.55   | 5.91   | 4.88 | 26.12  |
| protein_coding | 1.56    | 6.16    | 1.19   | 0.38   | 0.09   | 0.63   | 4.93 | 172.61 |
| protein_coding | 8.10    | 12.15   | 2.98   | 0.99   | 2.55   | 3.26   | 5.10 | 2.08   |
| protein_coding | 8.76    | 5.33    | 3.12   | 3.24   | 1.40   | 1.72   | 2.22 | 2.89   |
| protein_coding | 54.33   | 55.52   | 1.98   | 12.38  | 1.37   | 0.61   | 7.65 | 45.23  |
| protein_coding | 3.20    | 6.26    | 1.48   | 0.24   | 12.65  | 1.35   | 5.48 | 2.08   |
| protein_coding | 4.54    | 17.04   | 1.10   | 2.65   | 0.05   | 0.81   | 5.76 | 3.45   |
| protein_coding | 9.91    | 13.51   | 5.35   | 5.48   | 2.82   | 2.00   | 2.16 | 291.57 |
| protein_coding | 5.15    | 2.11    | 0.79   | 0.40   | 3.59   | 19.83  | 6.10 | 67.71  |
| protein_coding | 60.62   | 68.78   | 32.35  | 26.31  | 11.25  | 2.50   | 2.21 | 2.68   |
| protein_coding | 9.02    | 4.44    | 1.56   | 0.59   | 0.83   | 4.43   | 6.28 | 3.21   |
| protein_coding | 18.46   | 20.94   | 9.06   | 9.52   | 3.71   | 4.53   | 2.12 | 34.99  |
| protein_coding | 11.69   | 7.10    | 1.30   | 0.93   | 11.35  | 2.78   | 8.40 | 7.44   |
| protein_coding | 0.09    | 2.32    | 1.94   | 0.90   | 6.29   | 2.10   | 0.85 | 136.57 |
| protein_coding | 3.56    | 5.46    | 0.87   | 0.06   | 0.05   | 0.27   | 9.70 | 8.60   |
| protein_coding | 69.62   | 63.59   | 30.62  | 29.02  | 4.18   | 2.88   | 2.23 | 4.78   |

























**H3K9ac ChIP-seq****HDAC3 ChIP-seq**

| <b>TN_1</b> | <b>TN_2</b> | <b>CBZ_1</b> | <b>CBZ_2</b> | <b>Control_1</b> | <b>Control_2</b> | <b>TN_1</b> | <b>TN_2</b> | <b>CBZ_1</b> |
|-------------|-------------|--------------|--------------|------------------|------------------|-------------|-------------|--------------|
| 0.15        | 3.74        | 19.65        | 47.91        | 68.44            | 0.02             | 7.25        | 14.20       | 1.04         |
| 10.81       | 7.40        | 7.25         | 18.22        | 11.99            | 0.76             | 91.25       | 74.25       | 4.36         |
| 2.71        | 10.59       | 0.36         | 8.04         | 12.48            | 0.03             | 5.39        | 5.19        | 0.25         |
| 8.34        | 6.51        | 5.61         | 15.77        | 14.49            | 0.98             | 3.56        | 2.59        | 0.34         |
| 3.03        | 2.54        | 3.61         | 3.56         | 16.36            | 1.69             | 0.34        | 0.62        | 1.95         |
| 37.39       | 4.08        | 1.43         | 10.50        | 8.85             | 7.45             | 2.20        | 6.11        | 0.51         |
| 0.14        | 1.05        | 5.24         | 11.88        | 9.06             | 1.87             | 7.22        | 7.34        | 0.62         |
| 2.54        | 2.18        | 3.10         | 8.57         | 6.11             | 0.94             | 11.51       | 9.43        | 2.36         |
| 1.41        | 4.35        | 0.75         | 13.92        | 8.27             | 0.58             | 14.16       | 16.37       | 2.17         |
| 7.46        | 2.40        | 2.33         | 6.54         | 7.73             | 2.07             | 8.40        | 2.57        | 4.92         |
| 0.15        | 2.98        | 1.49         | 6.92         | 7.88             | 0.05             | 4.17        | 2.68        | 4.74         |
| 1.99        | 1.05        | 2.89         | 19.15        | 9.39             | 0.60             | 0.15        | 3.36        | 5.21         |
| 2.67        | 2.58        | 1.02         | 7.17         | 8.18             | 1.10             | 3.51        | 5.04        | 1.31         |
| 1.40        | 1.64        | 1.90         | 5.46         | 8.14             | 0.78             | 7.39        | 21.62       | 3.65         |
| 2.19        | 0.78        | 2.73         | 14.30        | 9.08             | 3.09             | 3.69        | 6.08        | 0.71         |
| 3.82        | 0.54        | 2.96         | 6.99         | 4.84             | 1.56             | 1.27        | 1.66        | 0.28         |
| 0.30        | 2.46        | 0.98         | 2.13         | 13.92            | 0.35             | 2.41        | 3.76        | 0.94         |
| 2.66        | 0.72        | 2.71         | 10.81        | 10.50            | 0.93             | 6.55        | 8.09        | 1.65         |
| 3.66        | 2.03        | 1.25         | 4.78         | 6.88             | 1.86             | 1.52        | 3.23        | 0.88         |
| 1.98        | 18.84       | 2.90         | 0.88         | 4.36             | 0.06             | 4.84        | 3.53        | 0.39         |
| 2.35        | 1.57        | 1.51         | 4.12         | 2.51             | 3.23             | 1.48        | 1.66        | 4.59         |
| 6.98        | 3.76        | 4.62         | 3.96         | 6.54             | 0.07             | 9.80        | 7.98        | 2.28         |
| 4.49        | 1.03        | 1.92         | 6.79         | 3.64             | 4.15             | 1.37        | 1.18        | 0.22         |
| 8.49        | 1.30        | 1.47         | 6.15         | 5.95             | 6.74             | 0.37        | 1.65        | 4.44         |
| 8.32        | 2.14        | 0.60         | 6.35         | 3.10             | 43.47            | 1.58        | 3.03        | 0.39         |
| 11.06       | 1.11        | 1.41         | 2.58         | 4.17             | 8.81             | 3.23        | 2.81        | 2.21         |
| 11.40       | 1.01        | 1.51         | 8.34         | 4.66             | 9.60             | 14.77       | 10.37       | 4.79         |
| 2.18        | 1.35        | 1.15         | 5.39         | 5.23             | 1.27             | 2.83        | 3.07        | 0.67         |
| 3.84        | 1.89        | 0.53         | 7.76         | 5.79             | 7.31             | 1.10        | 1.31        | 4.15         |
| 0.80        | 3.80        | 5.82         | 11.17        | 14.33            | 0.57             | 3.21        | 3.65        | 4.14         |
| 1.98        | 0.54        | 1.56         | 3.82         | 2.51             | 2.10             | 0.91        | 1.46        | 4.33         |
| 4.54        | 15.81       | 5.66         | 57.03        | 68.30            | 0.30             | 58.14       | 62.31       | 5.67         |
| 20.94       | 0.48        | 0.27         | 4.48         | 4.50             | 0.10             | 2.98        | 14.17       | 3.98         |
| 33.30       | 1.44        | 0.20         | 2.83         | 6.37             | 21.11            | 8.94        | 8.45        | 3.16         |
| 19.57       | 12.21       | 11.65        | 22.81        | 26.04            | 0.94             | 11.07       | 22.13       | 3.34         |
| 2.13        | 2.49        | 14.84        | 32.15        | 28.25            | 0.20             | 3.36        | 2.39        | 1.31         |
| 0.35        | 0.72        | 0.82         | 1.91         | 2.00             | 0.45             | 68.97       | 50.00       | 7.29         |
| 6.06        | 1.31        | 0.20         | 1.69         | 6.09             | 6.55             | 1.39        | 4.42        | 0.63         |
| 0.73        | 4.18        | 6.22         | 26.86        | 15.00            | 0.20             | 1.01        | 1.47        | 3.92         |
| 2.35        | 0.64        | 0.81         | 3.50         | 1.88             | 13.72            | 0.42        | 0.60        | 1.70         |
| 0.37        | 0.91        | 0.53         | 2.04         | 3.39             | 0.71             | 9.31        | 10.62       | 4.49         |
| 71.90       | 2.63        | 2.00         | 3.52         | 1.51             | 0.15             | 0.37        | 1.41        | 3.88         |
| 0.10        | 7.18        | 33.30        | 62.18        | 71.02            | 0.15             | 4.21        | 9.80        | 2.32         |
| 1.11        | 14.25       | 19.57        | 37.43        | 40.85            | 0.15             | 6.26        | 11.14       | 1.76         |
| 1.06        | 3.79        | 7.66         | 15.73        | 14.93            | 0.24             | 21.99       | 26.44       | 3.47         |
| 0.37        | 0.89        | 0.42         | 1.06         | 3.01             | 1.96             | 1.47        | 1.30        | 3.44         |
| 2.24        | 10.10       | 5.11         | 18.90        | 26.67            | 0.40             | 0.60        | 2.14        | 3.44         |
| 0.10        | 10.29       | 4.81         | 34.25        | 42.55            | 0.16             | 12.34       | 21.95       | 7.89         |
| 5.22        | 0.65        | 0.60         | 3.79         | 6.76             | 4.73             | 10.25       | 8.25        | 1.88         |
| 2.46        | 0.60        | 0.65         | 1.52         | 1.65             | 6.53             | 43.49       | 46.12       | 18.77        |

|       |       |       |        |        |       |       |        |       |
|-------|-------|-------|--------|--------|-------|-------|--------|-------|
| 8.04  | 13.51 | 55.58 | 129.96 | 137.83 | 0.16  | 13.41 | 13.01  | 3.77  |
| 1.02  | 0.59  | 0.62  | 0.85   | 1.78   | 3.98  | 1.41  | 1.11   | 3.36  |
| 0.11  | 0.75  | 0.46  | 0.93   | 3.72   | 0.77  | 4.68  | 2.60   | 3.34  |
| 2.11  | 0.25  | 0.91  | 1.34   | 2.41   | 8.15  | 4.50  | 4.05   | 1.24  |
| 2.84  | 20.20 | 11.58 | 39.32  | 48.13  | 0.18  | 3.65  | 1.57   | 3.31  |
| 4.16  | 13.47 | 17.77 | 39.08  | 47.92  | 0.18  | 0.93  | 0.71   | 0.33  |
| 11.63 | 52.10 | 46.83 | 115.90 | 101.52 | 0.18  | 18.94 | 18.05  | 3.30  |
| 23.26 | 41.24 | 10.05 | 84.73  | 105.19 | 0.63  | 2.32  | 5.30   | 1.04  |
| 5.07  | 0.48  | 0.58  | 2.48   | 2.26   | 5.27  | 9.19  | 50.97  | 18.48 |
| 0.58  | 0.49  | 0.54  | 3.01   | 1.10   | 38.81 | 12.53 | 8.28   | 4.13  |
| 0.54  | 10.64 | 3.83  | 37.90  | 37.09  | 0.23  | 43.55 | 35.10  | 13.38 |
| 3.83  | 0.20  | 0.78  | 1.53   | 2.41   | 10.35 | 27.25 | 23.76  | 10.35 |
| 0.37  | 20.22 | 27.87 | 57.15  | 66.25  | 0.10  | 24.83 | 12.99  | 3.24  |
| 5.00  | 26.93 | 22.38 | 59.60  | 63.02  | 0.21  | 21.95 | 35.31  | 11.50 |
| 3.30  | 16.01 | 12.03 | 30.44  | 35.29  | 0.22  | 5.34  | 49.64  | 17.07 |
| 1.12  | 2.50  | 3.03  | 9.81   | 9.84   | 0.68  | 41.17 | 36.32  | 15.90 |
| 0.54  | 0.21  | 0.69  | 1.88   | 1.07   | 22.58 | 38.48 | 44.10  | 13.30 |
| 1.88  | 0.47  | 0.40  | 1.06   | 0.95   | 2.42  | 6.17  | 5.20   | 2.23  |
| 5.22  | 12.15 | 10.89 | 26.67  | 29.81  | 0.82  | 24.69 | 18.74  | 3.23  |
| 8.81  | 25.94 | 37.95 | 85.23  | 79.11  | 0.24  | 6.03  | 31.26  | 15.63 |
| 3.06  | 12.44 | 9.74  | 32.90  | 30.13  | 0.25  | 19.66 | 72.40  | 34.04 |
| 2.12  | 8.21  | 10.01 | 18.86  | 26.73  | 0.25  | 25.30 | 22.27  | 8.90  |
| 4.08  | 20.49 | 17.15 | 102.66 | 99.70  | 0.26  | 9.91  | 7.47   | 3.16  |
| 3.05  | 1.64  | 2.21  | 6.71   | 4.30   | 1.02  | 41.89 | 42.45  | 14.64 |
| 5.48  | 12.11 | 29.67 | 74.71  | 91.64  | 0.26  | 1.45  | 1.15   | 0.58  |
| 7.02  | 23.73 | 20.24 | 47.96  | 46.96  | 0.26  | 46.06 | 58.48  | 18.97 |
| 5.58  | 16.08 | 20.31 | 32.24  | 52.78  | 0.27  | 5.64  | 102.03 | 39.61 |
| 0.10  | 14.04 | 13.50 | 29.30  | 36.13  | 0.28  | 15.60 | 15.77  | 2.51  |
| 0.69  | 1.27  | 1.56  | 3.62   | 3.63   | 1.05  | 7.36  | 5.23   | 2.25  |
| 11.82 | 24.11 | 17.43 | 60.68  | 43.87  | 0.30  | 4.71  | 6.76   | 2.07  |
| 3.50  | 11.27 | 13.58 | 31.89  | 31.63  | 0.29  | 21.44 | 24.20  | 9.24  |
| 0.74  | 2.58  | 6.30  | 16.14  | 9.38   | 0.29  | 4.03  | 2.42   | 2.49  |
| 2.36  | 12.36 | 10.95 | 43.50  | 39.76  | 0.30  | 7.58  | 4.52   | 2.49  |
| 4.06  | 4.28  | 9.22  | 20.45  | 20.40  | 0.34  | 10.85 | 13.49  | 2.48  |
| 1.70  | 8.13  | 5.88  | 17.44  | 18.97  | 0.31  | 47.29 | 43.06  | 2.48  |
| 4.97  | 3.39  | 1.67  | 7.92   | 8.55   | 1.27  | 1.82  | 2.54   | 0.73  |
| 1.82  | 3.26  | 2.92  | 7.04   | 9.32   | 0.60  | 3.15  | 0.32   | 2.47  |
| 3.83  | 0.29  | 0.34  | 1.38   | 8.39   | 8.69  | 13.18 | 12.97  | 6.50  |
| 1.46  | 12.42 | 13.53 | 30.52  | 27.06  | 0.32  | 9.86  | 28.71  | 8.05  |
| 8.42  | 19.47 | 28.87 | 69.92  | 70.63  | 0.33  | 13.18 | 11.91  | 2.40  |
| 2.85  | 0.39  | 0.21  | 0.59   | 2.11   | 18.97 | 7.10  | 13.64  | 2.44  |
| 2.85  | 11.18 | 7.85  | 23.19  | 30.84  | 0.34  | 7.89  | 5.88   | 2.77  |
| 1.45  | 7.76  | 4.49  | 17.71  | 17.96  | 0.34  | 6.56  | 9.53   | 2.35  |
| 3.76  | 10.13 | 8.49  | 21.03  | 20.78  | 0.35  | 13.72 | 16.18  | 6.27  |
| 10.89 | 64.71 | 54.31 | 42.17  | 261.08 | 0.35  | 7.96  | 6.95   | 3.73  |
| 5.10  | 11.17 | 11.06 | 24.96  | 27.90  | 0.36  | 17.02 | 11.97  | 5.61  |
| 4.17  | 12.76 | 11.40 | 39.22  | 33.60  | 0.36  | 2.22  | 4.64   | 1.38  |
| 4.02  | 0.36  | 0.20  | 4.65   | 6.31   | 9.64  | 2.93  | 2.15   | 2.31  |
| 1.21  | 2.81  | 3.80  | 8.69   | 9.24   | 0.36  | 0.40  | 0.89   | 2.31  |
| 8.99  | 16.86 | 23.81 | 47.84  | 48.15  | 0.36  | 8.13  | 2.45   | 2.30  |
| 1.61  | 4.95  | 5.04  | 7.98   | 15.14  | 0.36  | 3.74  | 6.41   | 2.30  |
| 0.91  | 2.47  | 2.65  | 5.92   | 4.88   | 0.37  | 8.54  | 7.64   | 2.29  |

|        |        |        |        |        |      |       |       |       |
|--------|--------|--------|--------|--------|------|-------|-------|-------|
| 0.10   | 6.08   | 4.89   | 14.04  | 10.81  | 0.38 | 12.28 | 20.74 | 2.28  |
| 7.57   | 31.10  | 18.85  | 72.01  | 92.34  | 0.38 | 18.03 | 14.61 | 7.25  |
| 5.10   | 11.32  | 13.01  | 38.76  | 28.68  | 0.38 | 11.03 | 11.71 | 5.55  |
| 4.29   | 12.03  | 12.79  | 26.19  | 27.12  | 0.39 | 6.96  | 6.36  | 2.95  |
| 6.67   | 12.45  | 16.40  | 42.21  | 36.43  | 0.39 | 21.51 | 8.63  | 6.47  |
| 14.90  | 40.77  | 42.11  | 91.92  | 103.37 | 0.39 | 19.11 | 7.73  | 12.82 |
| 8.38   | 26.98  | 20.39  | 67.99  | 56.18  | 0.39 | 8.99  | 10.83 | 31.03 |
| 1.71   | 2.20   | 2.39   | 5.13   | 6.66   | 0.39 | 3.09  | 0.77  | 29.30 |
| 3.05   | 10.12  | 9.33   | 18.45  | 24.22  | 0.40 | 2.05  | 0.39  | 7.83  |
| 5.00   | 8.14   | 8.70   | 23.00  | 25.73  | 0.40 | 14.83 | 18.44 | 8.32  |
| 17.87  | 49.27  | 54.98  | 120.86 | 139.01 | 0.40 | 12.88 | 17.47 | 2.23  |
| 3.24   | 5.74   | 5.85   | 12.88  | 11.20  | 0.40 | 9.11  | 7.98  | 4.08  |
| 0.10   | 1.95   | 1.96   | 4.61   | 5.28   | 0.40 | 13.40 | 2.77  | 2.51  |
| 5.19   | 15.36  | 13.51  | 28.16  | 36.09  | 0.41 | 10.37 | 9.45  | 4.62  |
| 2.05   | 3.00   | 2.27   | 10.37  | 10.16  | 0.41 | 79.17 | 85.14 | 38.93 |
| 0.10   | 9.95   | 10.77  | 31.89  | 12.19  | 0.41 | 23.70 | 23.42 | 10.15 |
| 3.48   | 10.82  | 12.53  | 28.83  | 23.83  | 0.41 | 36.58 | 40.18 | 16.00 |
| 2.09   | 7.52   | 6.88   | 25.72  | 23.32  | 0.42 | 30.46 | 30.19 | 13.39 |
| 10.07  | 24.32  | 21.94  | 53.68  | 50.88  | 0.42 | 89.70 | 35.90 | 28.51 |
| 7.79   | 15.99  | 16.22  | 36.32  | 32.89  | 0.42 | 9.68  | 9.62  | 4.35  |
| 11.20  | 19.06  | 24.17  | 52.46  | 48.91  | 0.42 | 19.64 | 21.92 | 10.32 |
| 1.37   | 4.19   | 3.20   | 12.85  | 8.06   | 0.42 | 5.33  | 2.75  | 1.95  |
| 1.79   | 4.10   | 3.17   | 4.73   | 11.94  | 0.43 | 41.17 | 42.04 | 18.59 |
| 2.90   | 6.90   | 5.93   | 14.90  | 13.20  | 0.43 | 5.83  | 3.00  | 2.19  |
| 5.51   | 15.78  | 20.52  | 136.01 | 159.22 | 0.43 | 6.91  | 6.49  | 2.19  |
| 5.51   | 18.92  | 17.57  | 61.13  | 55.64  | 0.44 | 6.52  | 6.09  | 2.18  |
| 5.27   | 10.65  | 9.06   | 21.07  | 22.64  | 0.44 | 12.28 | 20.74 | 2.17  |
| 4.42   | 10.31  | 12.28  | 22.02  | 29.79  | 0.44 | 5.20  | 6.51  | 2.81  |
| 3.54   | 7.22   | 8.44   | 21.34  | 16.90  | 0.44 | 20.83 | 26.11 | 10.98 |
| 3.65   | 7.30   | 5.95   | 7.08   | 22.47  | 0.44 | 30.29 | 37.45 | 16.26 |
| 0.10   | 4.34   | 5.13   | 10.35  | 10.86  | 0.45 | 36.98 | 41.96 | 19.30 |
| 5.14   | 13.41  | 12.62  | 38.55  | 40.89  | 0.47 | 30.25 | 33.46 | 15.82 |
| 18.48  | 37.68  | 39.84  | 93.15  | 94.75  | 0.47 | 16.69 | 14.80 | 7.82  |
| 3.35   | 8.55   | 9.23   | 76.39  | 90.61  | 0.48 | 10.76 | 13.13 | 5.71  |
| 7.88   | 16.03  | 15.42  | 31.26  | 33.80  | 0.49 | 13.31 | 19.23 | 8.07  |
| 173.65 | 316.27 | 309.55 | 797.21 | 880.11 | 0.49 | 69.86 | 77.38 | 36.36 |
| 22.91  | 11.83  | 11.83  | 3.26   | 8.57   | 2.00 | 23.10 | 22.97 | 11.34 |
| 17.38  | 9.97   | 9.97   | 6.02   | 3.95   | 2.00 | 34.71 | 31.69 | 16.24 |
| 8.89   | 4.97   | 4.93   | 1.56   | 3.29   | 2.02 | 42.32 | 36.10 | 19.26 |
| 60.56  | 29.08  | 28.23  | 4.06   | 4.39   | 2.03 | 42.06 | 37.59 | 19.82 |
| 56.50  | 31.92  | 33.03  | 18.99  | 12.40  | 2.03 | 10.48 | 8.64  | 2.02  |
| 198.85 | 96.74  | 96.66  | 49.62  | 45.15  | 2.04 | 4.82  | 11.65 | 4.08  |
| 66.81  | 30.74  | 28.66  | 17.80  | 10.39  | 2.07 | 24.94 | 19.15 | 11.01 |
| 35.58  | 16.14  | 15.91  | 7.46   | 3.48   | 2.07 | 41.28 | 37.30 | 19.64 |
| 15.63  | 7.00   | 7.54   | 2.89   | 3.18   | 2.07 | 8.87  | 0.10  | 9.25  |
| 42.18  | 18.80  | 19.30  | 6.58   | 11.00  | 2.08 | 1.10  | 1.55  | 2.76  |
| 126.30 | 77.54  | 74.29  | 33.56  | 29.69  | 2.09 | 3.27  | 0.10  | 3.57  |
| 29.17  | 18.25  | 17.41  | 9.07   | 7.81   | 2.09 | 4.94  | 3.46  | 8.65  |
| 19.90  | 9.37   | 9.40   | 3.47   | 5.90   | 2.09 | 8.21  | 8.98  | 17.65 |
| 23.08  | 9.83   | 10.11  | 3.08   | 5.62   | 2.09 | 7.66  | 4.94  | 13.58 |
| 25.31  | 13.29  | 13.26  | 10.42  | 2.65   | 2.11 | 15.04 | 17.15 | 36.20 |
| 90.53  | 33.62  | 36.67  | 7.44   | 10.90  | 2.11 | 14.01 | 19.18 | 37.89 |

|        |        |        |        |        |      |       |       |       |
|--------|--------|--------|--------|--------|------|-------|-------|-------|
| 31.94  | 14.18  | 12.99  | 4.65   | 8.34   | 2.11 | 23.01 | 20.07 | 51.21 |
| 6.79   | 2.66   | 2.50   | 0.86   | 1.06   | 2.11 | 8.42  | 8.93  | 19.41 |
| 20.01  | 7.37   | 7.51   | 2.04   | 3.56   | 2.12 | 1.99  | 2.09  | 5.03  |
| 54.50  | 25.04  | 27.50  | 12.41  | 10.05  | 2.13 | 0.55  | 1.61  | 2.53  |
| 36.46  | 17.58  | 15.37  | 6.45   | 7.74   | 2.13 | 4.33  | 1.26  | 6.14  |
| 15.49  | 7.96   | 8.91   | 5.26   | 2.70   | 2.15 | 4.10  | 4.65  | 9.51  |
| 5.03   | 2.04   | 2.24   | 5.62   | 1.26   | 2.16 | 5.35  | 2.24  | 7.69  |
| 25.13  | 10.97  | 10.38  | 4.52   | 2.90   | 2.17 | 20.87 | 27.04 | 48.89 |
| 5.04   | 1.69   | 1.75   | 0.75   | 0.87   | 2.18 | 5.28  | 10.64 | 17.78 |
| 456.85 | 670.89 | 626.00 | 280.69 | 314.59 | 2.19 | 4.96  | 5.27  | 10.22 |
| 106.69 | 41.91  | 41.18  | 19.45  | 17.16  | 2.19 | 17.75 | 24.09 | 9.79  |
| 95.55  | 41.36  | 35.17  | 5.40   | 6.28   | 2.19 | 4.51  | 1.68  | 6.70  |
| 432.09 | 178.61 | 183.96 | 88.24  | 87.46  | 2.20 | 3.87  | 6.59  | 13.32 |
| 14.49  | 7.10   | 8.00   | 3.33   | 3.54   | 2.21 | 3.85  | 2.12  | 6.09  |
| 17.14  | 8.86   | 7.75   | 3.78   | 3.64   | 2.21 | 2.69  | 0.41  | 3.14  |
| 28.72  | 13.83  | 13.04  | 5.73   | 6.15   | 2.21 | 9.78  | 9.38  | 23.51 |
| 30.76  | 14.84  | 15.97  | 7.72   | 6.80   | 2.21 | 2.60  | 2.69  | 7.31  |
| 10.64  | 4.75   | 4.49   | 2.79   | 1.69   | 2.22 | 4.05  | 2.89  | 10.11 |
| 38.69  | 19.69  | 17.15  | 7.49   | 9.60   | 2.23 | 9.02  | 3.55  | 14.25 |
| 8.91   | 4.92   | 4.70   | 2.20   | 2.07   | 2.23 | 10.33 | 0.10  | 12.84 |
| 47.49  | 22.50  | 23.75  | 8.88   | 6.72   | 2.23 | 14.51 | 10.68 | 29.71 |
| 23.24  | 9.45   | 11.51  | 4.63   | 3.38   | 2.24 | 13.23 | 8.63  | 25.15 |
| 17.72  | 8.36   | 8.63   | 4.70   | 2.22   | 2.24 | 1.14  | 1.12  | 3.23  |
| 35.29  | 16.58  | 13.77  | 6.26   | 7.37   | 2.25 | 4.10  | 3.18  | 4.07  |
| 34.15  | 19.09  | 15.59  | 6.73   | 5.03   | 2.26 | 8.68  | 4.17  | 14.77 |
| 11.88  | 6.11   | 6.62   | 2.87   | 3.14   | 2.28 | 3.66  | 3.49  | 10.30 |
| 19.89  | 8.79   | 9.53   | 3.31   | 4.57   | 2.29 | 4.08  | 3.38  | 10.70 |
| 1.63   | 0.91   | 0.78   | 2.09   | 1.19   | 2.30 | 4.64  | 4.55  | 12.96 |
| 30.19  | 13.03  | 13.34  | 6.52   | 6.09   | 2.30 | 4.31  | 0.90  | 1.40  |
| 117.51 | 61.98  | 47.44  | 8.91   | 6.54   | 2.30 | 4.41  | 10.41 | 21.67 |
| 18.13  | 6.80   | 6.76   | 1.35   | 4.48   | 2.30 | 5.70  | 0.10  | 9.69  |
| 156.42 | 74.68  | 65.16  | 30.13  | 28.23  | 2.30 | 32.07 | 48.79 | 66.92 |
| 10.11  | 4.42   | 4.55   | 2.60   | 1.68   | 2.33 | 2.68  | 3.38  | 8.35  |
| 24.38  | 10.69  | 12.74  | 4.85   | 2.95   | 2.34 | 50.30 | 44.71 | 16.91 |
| 10.94  | 4.60   | 5.60   | 0.95   | 2.98   | 2.34 | 1.46  | 2.75  | 5.81  |
| 900.24 | 437.99 | 374.63 | 173.66 | 147.11 | 2.34 | 1.79  | 3.37  | 5.49  |
| 34.76  | 14.76  | 14.91  | 5.78   | 7.93   | 2.34 | 1.47  | 3.41  | 8.87  |
| 18.23  | 9.02   | 9.20   | 5.78   | 1.87   | 2.35 | 7.46  | 0.10  | 12.88 |
| 22.97  | 8.73   | 12.56  | 17.83  | 4.64   | 2.36 | 3.26  | 1.60  | 6.53  |
| 60.31  | 27.17  | 22.48  | 10.32  | 10.18  | 2.36 | 2.85  | 2.42  | 8.15  |
| 80.02  | 35.70  | 31.62  | 13.53  | 16.72  | 2.36 | 0.76  | 0.10  | 1.08  |
| 3.95   | 2.42   | 1.78   | 0.80   | 0.10   | 2.37 | 4.13  | 4.76  | 12.71 |
| 8.65   | 2.84   | 3.61   | 2.98   | 1.04   | 2.37 | 2.64  | 0.10  | 5.12  |
| 19.35  | 8.75   | 8.34   | 7.64   | 0.10   | 2.38 | 6.39  | 5.67  | 22.60 |
| 7.26   | 3.32   | 2.61   | 0.76   | 1.69   | 2.39 | 1.87  | 1.04  | 5.43  |
| 44.61  | 18.96  | 19.76  | 9.79   | 8.57   | 2.40 | 0.27  | 3.09  | 0.27  |
| 25.85  | 9.33   | 13.63  | 1.92   | 2.32   | 2.41 | 3.90  | 1.92  | 9.71  |
| 794.57 | 284.37 | 379.54 | 106.44 | 115.71 | 2.42 | 2.37  | 0.30  | 3.60  |
| 33.52  | 11.64  | 15.02  | 5.03   | 3.23   | 2.42 | 0.27  | 1.33  | 2.25  |
| 100.58 | 48.06  | 35.90  | 14.29  | 21.29  | 2.44 | 1.22  | 1.69  | 2.54  |
| 47.38  | 17.55  | 18.80  | 9.11   | 6.49   | 2.47 | 1.45  | 0.12  | 2.00  |
| 90.64  | 46.05  | 28.36  | 7.55   | 7.54   | 2.48 | 3.96  | 3.92  | 12.19 |

|        |         |        |        |        |      |      |       |       |
|--------|---------|--------|--------|--------|------|------|-------|-------|
| 39.11  | 10.84   | 16.24  | 21.41  | 8.13   | 2.48 | 9.80 | 6.63  | 22.13 |
| 8.88   | 3.50    | 2.61   | 1.74   | 0.41   | 2.50 | 1.44 | 8.20  | 2.98  |
| 19.13  | 10.16   | 6.50   | 4.52   | 1.09   | 2.51 | 5.59 | 10.80 | 30.91 |
| 32.04  | 14.32   | 9.94   | 3.86   | 5.84   | 2.53 | 4.63 | 2.83  | 11.40 |
| 0.46   | 0.53    | 0.38   | 7.25   | 1.89   | 2.54 | 4.20 | 1.80  | 3.77  |
| 41.67  | 17.18   | 13.75  | 4.05   | 4.44   | 2.55 | 2.58 | 1.87  | 8.42  |
| 14.93  | 5.94    | 6.13   | 3.01   | 5.10   | 2.56 | 1.67 | 1.24  | 0.38  |
| 7.79   | 3.54    | 5.47   | 44.73  | 1.75   | 2.57 | 6.59 | 6.67  | 26.78 |
| 18.83  | 9.44    | 5.21   | 1.86   | 2.27   | 2.58 | 0.82 | 1.63  | 1.88  |
| 34.09  | 10.76   | 16.52  | 5.20   | 3.58   | 2.58 | 3.03 | 5.52  | 11.22 |
| 646.95 | 195.91  | 284.79 | 63.80  | 69.16  | 2.62 | 0.93 | 3.48  | 5.89  |
| 13.72  | 4.65    | 4.77   | 1.53   | 1.88   | 2.63 | 6.59 | 2.34  | 9.73  |
| 56.84  | 18.03   | 20.25  | 9.61   | 4.63   | 2.63 | 2.06 | 1.04  | 4.64  |
| 30.91  | 6.79    | 10.21  | 2.82   | 2.63   | 2.69 | 6.47 | 5.71  | 21.65 |
| 53.30  | 16.90   | 19.55  | 7.83   | 9.07   | 2.69 | 1.32 | 2.95  | 4.27  |
| 30.86  | 11.22   | 11.81  | 1.11   | 0.55   | 2.72 | 5.46 | 2.07  | 0.52  |
| 62.38  | 22.37   | 25.15  | 7.01   | 10.40  | 2.74 | 1.50 | 1.99  | 5.63  |
| 24.20  | 8.25    | 8.39   | 3.12   | 5.07   | 2.74 | 2.35 | 3.12  | 13.38 |
| 667.12 | 321.05  | 163.05 | 66.62  | 85.40  | 2.74 | 4.27 | 3.82  | 0.61  |
| 0.84   | 0.44    | 0.70   | 0.45   | 0.57   | 2.75 | 3.06 | 4.59  | 14.10 |
| 23.12  | 12.18   | 6.60   | 3.41   | 3.06   | 2.76 | 1.47 | 1.11  | 6.00  |
| 8.73   | 3.20    | 4.07   | 1.16   | 1.22   | 2.78 | 4.65 | 4.09  | 24.63 |
| 13.01  | 8.02    | 5.22   | 4.80   | 0.89   | 2.82 | 0.73 | 1.11  | 0.92  |
| 21.16  | 35.53   | 26.47  | 6.89   | 7.49   | 2.84 | 0.95 | 5.51  | 0.39  |
| 27.94  | 14.92   | 7.05   | 3.55   | 3.51   | 2.84 | 1.49 | 1.97  | 2.55  |
| 29.11  | 14.29   | 5.98   | 2.37   | 1.14   | 2.86 | 1.72 | 0.27  | 0.45  |
| 439.10 | 183.68  | 101.23 | 43.06  | 46.39  | 2.88 | 4.10 | 0.51  | 12.50 |
| 30.62  | 6.68    | 15.54  | 1.45   | 2.53   | 2.89 | 2.40 | 3.82  | 0.72  |
| 63.81  | 30.51   | 13.99  | 5.77   | 6.15   | 2.89 | 5.35 | 0.90  | 0.24  |
| 48.13  | 15.41   | 16.83  | 4.44   | 7.41   | 2.91 | 0.90 | 1.13  | 0.74  |
| 60.75  | 28.77   | 14.97  | 2.72   | 2.87   | 2.98 | 0.37 | 4.47  | 0.83  |
| 30.12  | 13.58   | 10.07  | 5.91   | 3.66   | 3.01 | 1.20 | 3.89  | 0.67  |
| 148.43 | 12.83   | 36.56  | 1.19   | 0.85   | 3.02 | 2.38 | 2.21  | 2.65  |
| 33.52  | 8.91    | 12.45  | 5.03   | 3.23   | 3.02 | 1.26 | 1.76  | 11.10 |
| 5.04   | 1.22    | 1.40   | 2.59   | 1.39   | 3.03 | 2.44 | 2.68  | 9.56  |
| 27.44  | 7.97    | 9.13   | 3.93   | 2.00   | 3.06 | 1.36 | 4.02  | 3.80  |
| 0.80   | 0.37    | 0.20   | 5.87   | 0.10   | 3.08 | 2.03 | 0.89  | 4.52  |
| 45.42  | 10.45   | 17.79  | 1.89   | 3.55   | 3.09 | 0.53 | 0.44  | 0.76  |
| 28.32  | 8.42    | 6.34   | 1.77   | 2.33   | 3.09 | 3.82 | 10.06 | 1.01  |
| 7.53   | 7.49    | 11.41  | 0.83   | 1.90   | 3.13 | 0.43 | 2.26  | 11.23 |
| 10.38  | 1.06    | 3.86   | 0.64   | 0.47   | 3.14 | 0.40 | 3.49  | 1.25  |
| 91.97  | 23.66   | 26.97  | 10.46  | 11.36  | 3.15 | 0.34 | 6.67  | 1.26  |
| 43.14  | 15.65   | 18.28  | 2.97   | 9.47   | 3.15 | 6.75 | 2.18  | 0.58  |
| 32.27  | 9.91    | 10.84  | 1.79   | 3.24   | 3.17 | 0.86 | 7.77  | 13.95 |
| 26.25  | 4.88    | 9.33   | 3.13   | 5.10   | 3.18 | 1.08 | 0.86  | 1.11  |
| 6.19   | 0.98    | 2.25   | 0.55   | 0.43   | 3.21 | 3.47 | 8.52  | 68.48 |
| 408.85 | 2016.97 | 332.42 | 471.96 | 500.82 | 3.22 | 3.08 | 1.63  | 0.25  |
| 2.17   | 0.94    | 0.25   | 1.37   | 2.84   | 3.22 | 2.79 | 2.60  | 10.97 |
| 195.58 | 52.31   | 57.35  | 26.98  | 21.12  | 3.26 | 0.69 | 2.38  | 1.87  |
| 6.55   | 2.59    | 2.01   | 1.88   | 0.33   | 3.26 | 0.88 | 6.87  | 0.51  |
| 19.83  | 6.09    | 7.96   | 1.04   | 2.14   | 3.29 | 3.29 | 1.22  | 1.82  |
| 2.50   | 0.30    | 1.40   | 3.60   | 1.02   | 3.30 | 3.71 | 0.32  | 2.29  |

|        |        |        |        |        |       |       |       |       |
|--------|--------|--------|--------|--------|-------|-------|-------|-------|
| 4.43   | 0.31   | 1.51   | 2.14   | 0.48   | 3.33  | 3.12  | 2.59  | 32.34 |
| 248.19 | 135.94 | 141.36 | 18.49  | 5.81   | 3.34  | 0.55  | 0.47  | 1.59  |
| 358.03 | 135.29 | 77.95  | 19.52  | 18.29  | 3.34  | 1.62  | 3.68  | 2.04  |
| 46.72  | 18.85  | 6.01   | 0.75   | 0.98   | 3.35  | 6.84  | 0.52  | 0.89  |
| 13.40  | 2.99   | 4.60   | 1.51   | 1.10   | 3.35  | 0.45  | 1.18  | 2.10  |
| 11.35  | 3.09   | 2.24   | 1.77   | 3.97   | 3.35  | 7.76  | 8.21  | 1.24  |
| 5.91   | 1.65   | 1.23   | 0.80   | 2.52   | 3.46  | 1.67  | 1.92  | 38.43 |
| 12.71  | 3.55   | 3.81   | 0.58   | 1.58   | 3.49  | 1.96  | 0.97  | 2.22  |
| 22.99  | 7.11   | 4.31   | 4.21   | 3.67   | 3.51  | 3.78  | 5.46  | 84.01 |
| 15.62  | 6.01   | 3.89   | 1.08   | 2.10   | 3.61  | 0.65  | 1.45  | 15.24 |
| 5.46   | 2.65   | 2.32   | 1.37   | 1.16   | 3.63  | 1.96  | 1.25  | 0.20  |
| 3.65   | 1.08   | 0.91   | 0.92   | 1.15   | 3.74  | 7.24  | 6.21  | 1.52  |
| 1.34   | 5.00   | 2.20   | 1.58   | 4.46   | 3.74  | 0.97  | 0.29  | 1.92  |
| 2.02   | 1.08   | 0.20   | 1.72   | 1.78   | 3.83  | 0.52  | 0.64  | 2.29  |
| 40.98  | 8.33   | 9.13   | 4.07   | 2.85   | 3.84  | 0.95  | 3.47  | 2.10  |
| 156.03 | 50.38  | 33.65  | 1.48   | 0.95   | 3.91  | 2.84  | 1.19  | 21.44 |
| 5.35   | 0.34   | 1.45   | 1.10   | 0.43   | 4.16  | 1.42  | 4.21  | 3.84  |
| 2.29   | 0.29   | 0.94   | 5.35   | 1.85   | 4.22  | 0.65  | 4.72  | 2.35  |
| 20.04  | 13.25  | 2.19   | 1.17   | 2.40   | 4.23  | 1.26  | 1.73  | 16.47 |
| 3.94   | 0.28   | 1.13   | 1.14   | 0.90   | 4.26  | 2.68  | 11.77 | 2.86  |
| 3.53   | 0.83   | 0.45   | 0.94   | 0.74   | 5.44  | 0.39  | 1.06  | 3.28  |
| 319.36 | 63.17  | 45.84  | 3.47   | 7.71   | 5.60  | 34.31 | 1.90  | 2.49  |
| 71.26  | 119.02 | 204.73 | 214.11 | 260.62 | 5.75  | 0.64  | 4.83  | 2.80  |
| 2.82   | 0.20   | 0.70   | 0.86   | 1.37   | 6.08  | 0.25  | 0.47  | 3.38  |
| 4.96   | 0.43   | 0.91   | 1.31   | 0.48   | 6.10  | 9.42  | 0.55  | 1.66  |
| 36.08  | 5.54   | 4.68   | 1.21   | 0.98   | 6.95  | 0.90  | 2.71  | 3.96  |
| 5.28   | 1.11   | 0.56   | 2.11   | 2.61   | 7.58  | 77.69 | 0.75  | 6.14  |
| 126.12 | 17.74  | 16.68  | 8.76   | 1.29   | 7.63  | 2.57  | 1.10  | 6.89  |
| 4.83   | 0.78   | 0.46   | 0.05   | 0.77   | 10.85 | 6.04  | 2.63  | 10.03 |
| 5.99   | 0.20   | 0.71   | 4.18   | 3.64   | 11.85 | 0.91  | 3.76  | 18.70 |

























**CBZ\_2**

4.53  
8.89  
0.75  
0.31  
0.97  
0.62  
1.60  
1.54  
3.69  
0.66  
0.68  
3.18  
0.56  
2.79  
1.47  
0.39  
0.47  
1.74  
0.26  
1.63  
6.03  
2.19  
0.43  
21.97  
0.78  
1.35  
1.69  
0.88  
1.04  
1.78  
0.97  
0.40  
3.92  
1.89  
6.32  
0.40  
28.37  
1.12  
6.17  
1.06  
6.17  
5.42  
2.08  
3.72  
12.30  
6.36  
6.39  
3.10  
4.21  
10.99

5.07  
3.82  
3.78  
3.70  
3.56  
0.24  
69.90  
1.66  
25.37  
3.45  
15.48  
8.54  
3.24  
10.32  
22.57  
13.82  
18.88  
2.21  
1.01  
14.26  
19.81  
9.92  
39.92  
19.11  
0.46  
22.98  
37.22  
31.06  
2.85  
2.59  
9.31  
7.69  
8.19  
11.22  
25.62  
1.07  
10.50  
4.46  
8.19  
7.23  
8.21  
3.13  
2.17  
6.64  
2.72  
6.94  
1.59  
11.34  
14.06  
17.85  
5.68  
3.52

4.75  
7.15  
4.49  
2.98  
6.98  
12.41  
38.41  
34.69  
9.27  
6.72  
12.51  
3.65  
8.80  
4.40  
36.00  
11.36  
19.07  
14.38  
44.00  
4.55  
8.92  
1.80  
20.37  
19.00  
25.32  
16.55  
46.48  
2.76  
11.47  
16.16  
18.65  
14.97  
7.47  
5.90  
7.82  
35.60  
11.25  
16.36  
19.46  
19.53  
7.93  
4.09  
11.00  
19.64  
8.97  
2.67  
3.43  
8.82  
18.25  
13.01  
32.19  
34.75

43.57  
19.15  
4.13  
2.33  
6.52  
10.34  
9.64  
60.74  
18.98  
13.47  
11.84  
7.71  
11.07  
7.94  
4.20  
22.27  
5.54  
6.94  
16.86  
12.99  
33.52  
30.62  
2.65  
4.51  
19.04  
8.80  
9.45  
11.97  
1.33  
18.87  
6.37  
53.39  
8.70  
22.16  
6.07  
9.12  
5.09  
8.85  
7.58  
7.24  
1.46  
13.56  
3.01  
13.38  
3.26  
0.34  
8.00  
4.06  
2.77  
3.09  
2.91  
12.91

31.15  
2.06  
24.14  
13.90  
2.69  
6.79  
0.31  
20.02  
1.37  
19.21  
9.85  
22.51  
6.69  
23.06  
7.27  
0.26  
8.38  
8.71  
0.21  
19.08  
5.34  
17.04  
3.11  
0.58  
7.55  
0.55  
8.35  
0.28  
0.80  
0.37  
0.29  
0.45  
1.62  
7.64  
22.23  
5.55  
9.54  
0.61  
0.42  
5.95  
0.31  
0.34  
1.05  
10.03  
0.62  
35.25  
1.61  
45.51  
0.24  
1.76  
2.32  
0.33

42.32  
1.06  
0.69  
1.84  
0.68  
35.67  
16.19  
1.01  
67.99  
19.50  
3.15  
2.06  
1.73  
1.41  
1.67  
4.29  
0.70  
2.00  
13.66  
2.33  
2.15  
3.04  
2.75  
2.47  
4.79  
4.44  
4.03  
5.22  
4.67  
40.48
